# Supplementary material
Source: HighWire-hosted journal article supplement (https://bmjopen.bmj.com/content/15/5/e089181)
Supplement: inline-supplementary-material-2 [file inline-supplementary-material-2.pdf]

Appendices

**Appendix B: Read Code Lists.....2**

*Table S1: Baseline Characteristics .....40*

*Table S2: Hazard ratios with 95% confidence intervals (CI) for mental ill health among patients with any atopic or allergic disorder compared to matched unexposed individuals .....41*

*Table S3: Hazard ratios with 95% confidence intervals (CI) for mental ill health among patients with food allergy only compared to matched unexposed individuals.....42*

*Table S4: Hazard ratios with 95% confidence intervals (CI) for mental ill health among patients with drug allergy only compared to matched unexposed individuals.....43*

*Table S5: Hazard ratios with 95% confidence intervals (CI) for mental ill health among patients with anaphylaxis only compared to matched unexposed individuals.....44*

*Table S6: Hazard ratios with 95% confidence intervals (CI) for mental ill health among patients with urticaria only compared to matched unexposed individuals.....45*

*Table S7: Hazard ratios with 95% confidence intervals (CI) for mental ill health among patients with allergic rhinitis only compared to matched unexposed individuals .....46*

## Appendix B: Read Code Lists

### Food Allergy

| Read Code | Description                        |
|-----------|------------------------------------|
| 13A6.00   | Milk free diet - allergy           |
| 13A7.00   | Egg free diet - allergy            |
| 14M1.00   | H/O: food allergy                  |
| 8CA4S00   | Dietary education for food allergy |
| 8CA4S11   | Dietary advice for food allergy    |
| J432.12   | Cow's milk allergy                 |
| SN58.00   | Food allergy                       |
| SN58000   | Egg allergy                        |
| SN58100   | Egg protein allergy                |
| SN58200   | Peanut allergy                     |
| SN58300   | Nut allergy                        |
| SN58400   | Wheat allergy                      |
| SN58500   | Fish allergy                       |
| SN58600   | Seafood allergy                    |
| SN58700   | Shellfish allergy                  |
| SN58800   | Mushroom allergy                   |
| SN58900   | Allergy to strawberries            |
| SN58911   | Strawberry allergy                 |
| SN58A00   | Allergy to soya                    |
| SN58B00   | Allergy to banana                  |
| SN58C00   | Allergy to tomato                  |
| ZC21L00   | Advice to avoid nut intake         |
| ZC2CF00   | Dietary advice for food allergy    |

### Drug Allergy

| Read Code | Description                    |
|-----------|--------------------------------|
| 14L..00   | H/O: drug allergy              |
| 14L1.00   | H/O: penicillin allergy        |
| 14L2.00   | H/O: antibiotic allergy NOS    |
| 14L3.00   | H/O: anaesthetic allergy       |
| 14L4.00   | H/O: analgesic allergy         |
| 14L5.00   | H/O: vaccine allergy           |
| 14L5000   | H/O: rotavirus vaccine allergy |
| 14L6.00   | H/O: serum allergy             |
| 14L7.00   | H/O: cephalosporin allergy     |
| 14L8.00   | H/O: tetracycline allergy      |
| 14L9.00   | H/O: gentamicin allergy        |
| 14La.00   | H/O: raloxifene allergy        |
| 14LA.00   | H/O: erythromycin allergy      |
| 14Lb.00   | H/O: teriparatide allergy      |
| 14LB.00   | H/O: neomycin allergy          |

|         |                                                           |
|---------|-----------------------------------------------------------|
| 14Lc.00 | H/O denosumab allergy                                     |
| 14LC.00 | H/O: chloramphenicol allergy                              |
| 14Ld.00 | H/O calcitonin allergy                                    |
| 14LD.00 | H/O: sulphonamide allergy                                 |
| 14LE.00 | H/O: trimethoprim allergy                                 |
| 14LF.00 | H/O: co-trimoxazole allergy                               |
| 14LG.00 | H/O: metronidazole allergy                                |
| 14LH.00 | H/O: nalidixic acid allergy                               |
| 14LI.00 | H/O: nitrofurantoin allergy                               |
| 14LJ.00 | H/O: influenza vaccine allergy                            |
| 14LK.00 | H/O: aspirin allergy                                      |
| 14LL.00 | H/O: betablocker allergy                                  |
| 14LM.00 | H/O: angiotensin converting enzyme inhibitor allergy      |
| 14LN.00 | H/O: angiotensin II receptor antagonist allergy           |
| 14LP.00 | H/O: warfarin allergy                                     |
| 14LQ.00 | H/O: clopidogrel allergy                                  |
| 14LR.00 | H/O: pneumococcal vaccine allergy                         |
| 14LS.00 | H/O: combined calcium and vitamin D3 preparation allergy  |
| 14LT.00 | H/O: bisphosphonate allergy                               |
| 14LT000 | H/O ibandronic acid allergy                               |
| 14LT200 | H/O disodium etidronate allergy                           |
| 14LT300 | H/O alendronic acid allergy                               |
| 14LT400 | H/O risedronate sodium allergy                            |
| 14LV.00 | H/O: selective oestrogen receptor modulator allergy       |
| 14LW.00 | H/O: strontium ranelate allergy                           |
| 14LX.00 | H/O: dipyridamole allergy                                 |
| 14LY.00 | Phosphodiesterase-5 inhibitor allergy                     |
| 14LZ.00 | H/O: drug allergy NOS                                     |
| 1Z4..00 | Allergic reaction to drug                                 |
| 1Z4..11 | Drug allergy                                              |
| 1Z42.00 | Ticagrelor allergy                                        |
| 1Z43.00 | Anticoagulant allergy                                     |
| 1Z43000 | Rivaroxaban allergy                                       |
| 1Z43100 | Apixaban allergy                                          |
| SN52.12 | Allergic drug reaction NOS                                |
| ZV14.00 | [V]Personal history of drug allergy                       |
| ZV14000 | [V]Personal history of penicillin allergy                 |
| ZV14100 | [V]Personal history of other antibiotic allergy           |
| ZV14200 | [V]Personal history of sulphonamide allergy               |
| ZV14300 | [V]Personal history of other anti-infective agent allergy |

|         |                                                         |
|---------|---------------------------------------------------------|
| ZV14400 | [V]Personal history of anaesthetic agent allergy        |
| ZV14500 | [V]Personal history of narcotic agent allergy           |
| ZV14600 | [V]Personal history of analgesic agent allergy          |
| ZV14700 | [V]Personal history of serum or vaccine allergy         |
| ZV14800 | [V]Personal history of aspirin allergy                  |
| ZV14900 | [V]Personal history of co-proxamol allergy              |
| ZV14A00 | [V]Personal history of warfarin allergy                 |
| ZV14B00 | [V]Personal history of clopidogrel allergy              |
| ZV14C00 | [V]Personal history of betablocker allergy              |
| ZV14D00 | [V]PH angiotensin-converting-enzyme inhibitor allergy   |
| ZV14E00 | [V]PH of angiotensin II receptor antagonist allergy     |
| ZV14F00 | [V]Personal history of influenza vaccine allergy        |
| ZV14G00 | [V]Personal history of pneumococcal vaccine allergy     |
| ZV14H00 | [V]Personal history of strontium ranelate allergy       |
| ZV14J00 | [V]PH of selective oestrogen receptor modulator allergy |
| ZV14K00 | [V]Personal history of bisphosphonate allergy           |
| ZV14L00 | [V]Personal history of calcium allergy                  |
| ZV14M00 | [V]Personal history of vitamin D3 allergy               |
| ZV14y00 | [V]Personal history of other specified drug allergy     |
| ZV14z00 | [V]Personal history of unspecified drug allergy         |

### Anaphylaxis

| Read Code | Description                                                   |
|-----------|---------------------------------------------------------------|
| 14M5.00   | H/O: anaphylactic shock                                       |
| SN50.00   | Anaphylactic shock                                            |
| SN50.11   | Anaphylaxis                                                   |
| SN50000   | Anaphylactic shock due to adverse food reaction               |
| SN50100   | Anaphy shock due/adv effect/correct drug or med proprly admin |
| SN59300   | Anaphylactic shock due to bee sting                           |
| SN59400   | Anaphylactic shock due to wasp sting                          |
| SP34.00   | Anaphylactic shock due to serum                               |
| ZV1B300   | [V]Personal history of food induced                           |

|  |             |
|--|-------------|
|  | anaphylaxis |
|--|-------------|

Urticaria

| Read Code | Description                        |
|-----------|------------------------------------|
| 2F8..00   | O/E - weals present                |
| C373400   | Familial febrile urticaria         |
| M12A200   | Solar urticaria                    |
| M28..00   | Urticaria                          |
| M280.00   | Allergic urticaria                 |
| M280.11   | Drug induced urticaria             |
| M281.00   | Idiopathic urticaria               |
| M282.00   | Urticaria due to cold and heat     |
| M282000   | Cold urticaria                     |
| M282100   | Thermal urticaria                  |
| M282111   | Heat urticaria                     |
| M282z00   | Urticaria due to cold and heat NOS |
| M283.00   | Dermatographic urticaria           |
| M283.11   | Factitial urticaria                |
| M284.00   | Vibratory urticaria                |
| M285.00   | Cholinergic urticaria              |
| M286.00   | Contact urticaria                  |
| M287.00   | Physical urticaria                 |
| M28y.00   | Other specified urticaria          |
| M28y.11   | Nettle rash                        |
| M28y000   | Urticaria geographica              |
| M28y100   | Menstrual urticaria                |
| M28y200   | Urticaria persistans               |
| M28yz00   | Other specified urticaria NOS      |
| M28z.00   | Urticaria NOS                      |
| M28z.11   | Hives                              |
| Myu4.00   | [X]Urticaria and erythema          |
| Myu4000   | [X]Other urticaria                 |
| PH32100   | Urticaria pigmentosa               |
| SN51.00   | Angioneurotic oedema               |
| SN51.11   | Angioedema                         |
| SP35400   | Urticaria due to serum             |

Allergic Rhinitis

| Read Code | Description                                |
|-----------|--------------------------------------------|
| F4A3100   | Vernal conjunctivitis of limbus and cornea |
| F4C0600   | Acute atopic conjunctivitis                |
| F4C0611   | Acute allergic conjunctivitis              |
| F4C1300   | Vernal conjunctivitis                      |
| F4C1400   | Other chronic allergic conjunctivitis      |
| F4C1411   | Allergic conjunctivitis                    |
| H17..00   | Allergic rhinitis                          |

|         |                                               |
|---------|-----------------------------------------------|
| H17..11 | Perennial rhinitis                            |
| H17..12 | Allergic rhinosinusitis                       |
| H170.00 | Allergic rhinitis due to pollens              |
| H170.11 | Hay fever - pollens                           |
| H170.12 | Pollinosis                                    |
| H171.00 | Allergic rhinitis due to other allergens      |
| H171.11 | Cat allergy                                   |
| H171.12 | Dander (animal) allergy                       |
| H171.13 | Feather allergy                               |
| H171.14 | Hay fever - other allergen                    |
| H171.15 | House dust allergy                            |
| H171.16 | House dust mite allergy                       |
| H171000 | Allergy to animal                             |
| H171100 | Dog allergy                                   |
| H172.00 | Allergic rhinitis due to unspecified allergen |
| H172.11 | Hay fever - unspecified allergen              |
| H17z.00 | Allergic rhinitis NOS                         |
| H330.14 | Pollen asthma                                 |
| Hyu2000 | [X]Other seasonal allergic rhinitis           |
| Hyu2100 | [X]Other allergic rhinitis                    |
| SN5A.00 | Oral allergy syndrome                         |

### Serious mental illness

| Read Code | Description                                                 |
|-----------|-------------------------------------------------------------|
| 146D.00   | H/O: manic depressive disorder                              |
| 1BH3.00   | Paranoid ideation                                           |
| 1S42.00   | Manic mood                                                  |
| 212T.00   | Psychosis schizophrenia + bipolar affective disord resolved |
| 212V.00   | Bipolar affective disorder resolved                         |
| 225E.00   | O/E - paranoid delusions                                    |
| 9H8..00   | On severe mental illness register                           |
| E1...00   | Non-organic psychoses                                       |
| E10..00   | Schizophrenic disorders                                     |
| E100.00   | Simple schizophrenia                                        |
| E100.11   | Schizophrenia simplex                                       |
| E100000   | Unspecified schizophrenia                                   |
| E100100   | Subchronic schizophrenia                                    |
| E100200   | Chronic schizophrenic                                       |
| E100300   | Acute exacerbation of subchronic schizophrenia              |
| E100400   | Acute exacerbation of chronic schizophrenia                 |
| E100500   | Schizophrenia in remission                                  |
| E100z00   | Simple schizophrenia NOS                                    |
| E101.00   | Hebephrenic schizophrenia                                   |

|         |                                                            |
|---------|------------------------------------------------------------|
| E101000 | Unspecified hebephrenic schizophrenia                      |
| E101100 | Subchronic hebephrenic schizophrenia                       |
| E101200 | Chronic hebephrenic schizophrenia                          |
| E101300 | Acute exacerbation of subchronic hebephrenic schizophrenia |
| E101400 | Acute exacerbation of chronic hebephrenic schizophrenia    |
| E101500 | Hebephrenic schizophrenia in remission                     |
| E101z00 | Hebephrenic schizophrenia NOS                              |
| E102.00 | Catatonic schizophrenia                                    |
| E102000 | Unspecified catatonic schizophrenia                        |
| E102100 | Subchronic catatonic schizophrenia                         |
| E102200 | Chronic catatonic schizophrenia                            |
| E102300 | Acute exacerbation of subchronic catatonic schizophrenia   |
| E102400 | Acute exacerbation of chronic catatonic schizophrenia      |
| E102500 | Catatonic schizophrenia in remission                       |
| E102z00 | Catatonic schizophrenia NOS                                |
| E103.00 | Paranoid schizophrenia                                     |
| E103000 | Unspecified paranoid schizophrenia                         |
| E103100 | Subchronic paranoid schizophrenia                          |
| E103200 | Chronic paranoid schizophrenia                             |
| E103300 | Acute exacerbation of subchronic paranoid schizophrenia    |
| E103400 | Acute exacerbation of chronic paranoid schizophrenia       |
| E103500 | Paranoid schizophrenia in remission                        |
| E103z00 | Paranoid schizophrenia NOS                                 |
| E104.00 | Acute schizophrenic episode                                |
| E105.00 | Latent schizophrenia                                       |
| E105000 | Unspecified latent schizophrenia                           |
| E105100 | Subchronic latent schizophrenia                            |
| E105200 | Chronic latent schizophrenia                               |
| E105300 | Acute exacerbation of subchronic latent schizophrenia      |
| E105400 | Acute exacerbation of chronic latent schizophrenia         |
| E105500 | Latent schizophrenia in remission                          |
| E105z00 | Latent schizophrenia NOS                                   |
| E106.00 | Residual schizophrenia                                     |
| E106.11 | Restzustand - schizophrenia                                |
| E107.00 | Schizo-affective schizophrenia                             |
| E107.11 | Cyclic schizophrenia                                       |
| E107000 | Unspecified schizo-affective schizophrenia                 |
| E107100 | Subchronic schizo-affective schizophrenia                  |

|         |                                                              |
|---------|--------------------------------------------------------------|
| E107200 | Chronic schizo-affective schizophrenia                       |
| E107300 | Acute exacerbation subchronic schizo-affective schizophrenia |
| E107400 | Acute exacerbation of chronic schizo-affective schizophrenia |
| E107500 | Schizo-affective schizophrenia in remission                  |
| E107z00 | Schizo-affective schizophrenia NOS                           |
| E10y.00 | Other schizophrenia                                          |
| E10y.11 | Cenesthopathic schizophrenia                                 |
| E10y000 | Atypical schizophrenia                                       |
| E10y100 | Coenesthopathic schizophrenia                                |
| E10yz00 | Other schizophrenia NOS                                      |
| E10z.00 | Schizophrenia NOS                                            |
| E11..11 | Bipolar psychoses                                            |
| E11..13 | Manic psychoses                                              |
| E110.00 | Manic disorder single episode                                |
| E110.11 | Hypomanic psychoses                                          |
| E110000 | Single manic episode unspecified                             |
| E110100 | Single manic episode mild                                    |
| E110200 | Single manic episode moderate                                |
| E110300 | Single manic episode severe without mention of psychosis     |
| E110400 | Single manic episode severe with psychosis                   |
| E110500 | Single manic episode in partial or unspecified remission     |
| E110600 | Single manic episode in full remission                       |
| E110z00 | Manic disorder single episode NOS                            |
| E111.00 | Recurrent manic episodes                                     |
| E111000 | Recurrent manic episodes unspecified                         |
| E111100 | Recurrent manic episodes mild                                |
| E111200 | Recurrent manic episodes moderate                            |
| E111300 | Recurrent manic episodes severe without mention psychosis    |
| E111400 | Recurrent manic episodes severe with psychosis               |
| E111500 | Recurrent manic episodes partial or unspecified remission    |
| E111600 | Recurrent manic episodes in full remission                   |
| E111z00 | Recurrent manic episode NOS                                  |
| E114.00 | Bipolar affective disorder currently manic                   |
| E114.11 | Manic-depressive - now manic                                 |
| E114000 | Bipolar affective disorder currently manic unspecified       |
| E114100 | Bipolar affective disorder currently manic mild              |
| E114200 | Bipolar affective disorder currently manic                   |



|         |                                                             |
|---------|-------------------------------------------------------------|
|         | moderate                                                    |
| E114300 | Bipolar affect disord currently manic severe no psychosis   |
| E114400 | Bipolar affect disord currently manic severe with psychosis |
| E114500 | Bipolar affect disord currently manic part/unspec remission |
| E114600 | Bipolar affective disorder currently manic full remission   |
| E114z00 | Bipolar affective disorder currently manic NOS              |
| E115.00 | Bipolar affective disorder currently depressed              |
| E115.11 | Manic-depressive - now depressed                            |
| E115000 | Bipolar affective disorder currently depressed unspecified  |
| E115100 | Bipolar affective disorder currently depressed mild         |
| E115200 | Bipolar affective disorder currently depressed moderate     |
| E115300 | Bipolar affect disord now depressed severe no psychosis     |
| E115400 | Bipolar affect disord now depressed severe with psychosis   |
| E115500 | Bipolar affect disord now depressed part/unspec remission   |
| E115600 | Bipolar affective disorder now depressed in full remission  |
| E115z00 | Bipolar affective disorder currently depressed NOS          |
| E116.00 | Mixed bipolar affective disorder                            |
| E116000 | Mixed bipolar affective disorder unspecified                |
| E116100 | Mixed bipolar affective disorder mild                       |
| E116200 | Mixed bipolar affective disorder moderate                   |
| E116300 | Mixed bipolar affective disorder severe no psychosis        |
| E116400 | Mixed bipolar affective disorder severe with psychosis      |
| E116500 | Mixed bipolar affective disorder partial/unspec remission   |
| E116600 | Mixed bipolar affective disorder in full remission          |
| E116z00 | Mixed bipolar affective disorder NOS                        |
| E117.00 | Unspecified bipolar affective disorder                      |
| E117000 | Unspecified bipolar affective disorder                      |

|         |                                                              |
|---------|--------------------------------------------------------------|
|         | unspecified                                                  |
| E117100 | Unspecified bipolar affective disorder mild                  |
| E117200 | Unspecified bipolar affective disorder moderate              |
| E117300 | Unspecified bipolar affective disorder severe no psychosis   |
| E117400 | Unspecified bipolar affective disorder severe with psychosis |
| E117500 | Unspecified bipolar affect disord partial/unspec remission   |
| E117600 | Unspecified bipolar affective disorder in full remission     |
| E117z00 | Unspecified bipolar affective disorder NOS                   |
| E11y.00 | Other and unspecified manic-depressive psychoses             |
| E11y000 | Unspecified manic-depressive psychoses                       |
| E11y100 | Atypical manic disorder                                      |
| E11y300 | Other mixed manic-depressive psychoses                       |
| E11yz00 | Other and unspecified manic-depressive psychoses NOS         |
| E12..00 | Paranoid states                                              |
| E120.00 | Simple paranoid state                                        |
| E121.00 | Chronic paranoid psychosis                                   |
| E123.00 | Shared paranoid disorder                                     |
| E12y.00 | Other paranoid states                                        |
| E12yz00 | Other paranoid states NOS                                    |
| E12z.00 | Paranoid psychosis NOS                                       |
| E13..00 | Other nonorganic psychoses                                   |
| E13..11 | Reactive psychoses                                           |
| E131.00 | Acute hysterical psychosis                                   |
| E133.00 | Acute paranoid reaction                                      |
| E134.00 | Psychogenic paranoid psychosis                               |
| E13y.00 | Other reactive psychoses                                     |
| E13y000 | Psychogenic stupor                                           |
| E13y100 | Brief reactive psychosis                                     |
| E13yz00 | Other reactive psychoses NOS                                 |
| E13z.00 | Nonorganic psychosis NOS                                     |
| E13z.11 | Psychotic episode NOS                                        |
| E14..00 | Psychoses with origin in childhood                           |
| E141.00 | Disintegrative psychosis                                     |
| E14y.00 | Other childhood psychoses                                    |
| E14y000 | Atypical childhood psychoses                                 |
| E14y100 | Borderline psychosis of childhood                            |
| E14yz00 | Other childhood psychoses NOS                                |
| E14z.00 | Child psychosis NOS                                          |
| E14z.11 | Childhood schizophrenia NOS                                  |

|         |                                                              |
|---------|--------------------------------------------------------------|
| E1y..00 | Other specified non-organic psychoses                        |
| E1z..00 | Non-organic psychosis NOS                                    |
| Eu2..00 | [X]Schizophrenia schizotypal and delusional disorders        |
| Eu20.00 | [X]Schizophrenia                                             |
| Eu20000 | [X]Paranoid schizophrenia                                    |
| Eu20011 | [X]Paraphrenic schizophrenia                                 |
| Eu20100 | [X]Hebephrenic schizophrenia                                 |
| Eu20111 | [X]Disorganised schizophrenia                                |
| Eu20200 | [X]Catatonic schizophrenia                                   |
| Eu20211 | [X]Catatonic stupor                                          |
| Eu20212 | [X]Schizophrenic catalepsy                                   |
| Eu20213 | [X]Schizophrenic catatonia                                   |
| Eu20214 | [X]Schizophrenic flexibilatis cerea                          |
| Eu20300 | [X]Undifferentiated schizophrenia                            |
| Eu20311 | [X]Atypical schizophrenia                                    |
| Eu20400 | [X]Post-schizophrenic depression                             |
| Eu20500 | [X]Residual schizophrenia                                    |
| Eu20511 | [X]Chronic undifferentiated schizophrenia                    |
| Eu20512 | [X]Restzustand schizophrenic                                 |
| Eu20600 | [X]Simple schizophrenia                                      |
| Eu20y00 | [X]Other schizophrenia                                       |
| Eu20y11 | [X]Cenesthopathic schizophrenia                              |
| Eu20y12 | [X]Schizophreniform disord NOS                               |
| Eu20y13 | [X]Schizophrenifrm psychos NOS                               |
| Eu20z00 | [X]Schizophrenia unspeified                                  |
| Eu21.00 | [X]Schizotypal disorder                                      |
| Eu21.11 | [X]Latent schizophrenic reaction                             |
| Eu21.12 | [X]Borderline schizophrenia                                  |
| Eu21.13 | [X]Latent schizophrenia                                      |
| Eu21.14 | [X]Prepsychotic schizophrenia                                |
| Eu21.15 | [X]Prodromal schizophrenia                                   |
| Eu21.16 | [X]Pseudoneurotic schizophrenia                              |
| Eu21.17 | [X]Pseudopsychopathic schizophrenia                          |
| Eu22.00 | [X]Persistent delusional disorders                           |
| Eu22000 | [X]Delusional disorder                                       |
| Eu22011 | [X]Paranoid psychosis                                        |
| Eu22012 | [X]Paranoid state                                            |
| Eu22013 | [X]Paraphrenia - late                                        |
| Eu22014 | [X>Sensitiver Beziehungswahn                                 |
| Eu22015 | [X]Paranoia                                                  |
| Eu22300 | [X]Paranoid state in remission                               |
| Eu22y12 | [X]Involutional paranoid state                               |
| Eu23012 | [X]Cycloid psychosis                                         |
| Eu23100 | [X]Acute polymorphic psychot disord with symp of schizophren |

|         |                                                       |
|---------|-------------------------------------------------------|
| Eu23111 | [X]Bouffee delirante with symptoms of schizophrenia   |
| Eu23112 | [X]Cycloid psychosis with symptoms of schizophrenia   |
| Eu23200 | [X]Acute schizophrenia-like psychotic disorder        |
| Eu23211 | [X]Brief schizophreniform disorder                    |
| Eu23212 | [X]Brief schizophreniform psych                       |
| Eu23214 | [X]Schizophrenic reaction                             |
| Eu23312 | [X]Psychogenic paranoid psychosis                     |
| Eu23y00 | [X]Other acute and transient psychotic disorders      |
| Eu23z00 | [X]Acute and transient psychotic disorder unspecified |
| Eu23z11 | [X]Brief reactive psychosis NOS                       |
| Eu23z12 | [X]Reactive psychosis                                 |
| Eu24.12 | [X]Induced paranoid disorder                          |
| Eu25.00 | [X]Schizoaffective disorders                          |
| Eu25000 | [X]Schizoaffective disorder manic type                |
| Eu25011 | [X]Schizoaffective psychosis manic type               |
| Eu25012 | [X]Schizophreniform psychosis manic type              |
| Eu25100 | [X]Schizoaffective disorder depressive type           |
| Eu25111 | [X]Schizoaffective psychosis depressive type          |
| Eu25112 | [X]Schizophreniform psychosis depressive type         |
| Eu25200 | [X]Schizoaffective disorder mixed type                |
| Eu25211 | [X]Cyclic schizophrenia                               |
| Eu25212 | [X]Mixed schizophrenic and affective psychosis        |
| Eu25y00 | [X]Other schizoaffective disorders                    |
| Eu25z00 | [X]Schizoaffective disorder unspecified               |
| Eu25z11 | [X]Schizoaffective psychosis NOS                      |
| Eu26.00 | [X]Nonorganic psychosis in remission                  |
| Eu2y.00 | [X]Other nonorganic psychotic disorders               |
| Eu2y.11 | [X]Chronic hallucinatory psychosis                    |
| Eu2z.00 | [X]Unspecified nonorganic psychosis                   |
| Eu2z.11 | [X]Psychosis NOS                                      |
| Eu30.00 | [X]Manic episode                                      |
| Eu30.11 | [X]Bipolar disorder single manic episode              |
| Eu30000 | [X]Hypomania                                          |
| Eu30100 | [X]Mania without psychotic symptoms                   |
| Eu30200 | [X]Mania with psychotic symptoms                      |
| Eu30211 | [X]Mania with mood-congruent psychotic symptoms       |
| Eu30212 | [X]Mania with mood-incongruent psychotic              |

|         |                                                              |
|---------|--------------------------------------------------------------|
|         | symptoms                                                     |
| Eu30213 | [X]Manic stupor                                              |
| Eu30y00 | [X]Other manic episodes                                      |
| Eu30z00 | [X]Manic episode unspecified                                 |
| Eu30z11 | [X]Mania NOS                                                 |
| Eu31.00 | [X]Bipolar affective disorder                                |
| Eu31.11 | [X]Manic-depressive illness                                  |
| Eu31.12 | [X]Manic-depressive psychosis                                |
| Eu31.13 | [X]Manic-depressive reaction                                 |
| Eu31000 | [X]Bipolar affective disorder current episode hypomanic      |
| Eu31100 | [X]Bipolar affect disorder cur epi manic wout psychotic symp |
| Eu31200 | [X]Bipolar affect disorder cur epi manic with psychotic symp |
| Eu31300 | [X]Bipolar affect disorder cur epi mild or moderate depressn |
| Eu31400 | [X]Bipol aff disord curr epis sev depress no psychot symp    |
| Eu31500 | [X]Bipolar affect dis cur epi severe depres with psyc symp   |
| Eu31600 | [X]Bipolar affective disorder current episode mixed          |
| Eu31700 | [X]Bipolar affective disorder currently in remission         |
| Eu31800 | [X]Bipolar affective disorder type I                         |
| Eu31900 | [X]Bipolar affective disorder type II                        |
| Eu31911 | [X]Bipolar II disorder                                       |
| Eu31y00 | [X]Other bipolar affective disorders                         |
| Eu31y11 | [X]Bipolar II disorder                                       |
| Eu31y12 | [X]Recurrent manic episodes                                  |
| Eu31z00 | [X]Bipolar affective disorder unspecified                    |
| Eu33213 | [X]Manic-depress psychosis depressed no psychotic symptoms   |
| Eu33312 | [X]Manic-depress psychosis depressed type+psychotic symptoms |
| ZRby100 | Profile of mood states bipolar                               |
| ZV11111 | [V]Personal history of manic-depressive psychosis            |
| ZV11112 | [V]Personal history of manic-depressive psychosis            |

**Anxiety**

| Read Code | Description                              |
|-----------|------------------------------------------|
| 146G.00   | H/O: agoraphobia                         |
| 8CAZ000   | Patient given advice about management of |

|         |                                                              |
|---------|--------------------------------------------------------------|
|         | anxiety                                                      |
| 8Hhp.00 | Referral for guided self-help for anxiety                    |
| E20..00 | Neurotic disorders                                           |
| E200.00 | Anxiety states                                               |
| E200000 | Anxiety state unspecified                                    |
| E200100 | Panic disorder                                               |
| E200200 | Generalised anxiety disorder                                 |
| E200400 | Chronic anxiety                                              |
| E200500 | Recurrent anxiety                                            |
| E200z00 | Anxiety state NOS                                            |
| E202.00 | Phobic disorders                                             |
| E202.11 | Social phobic disorders                                      |
| E202.12 | Phobic anxiety                                               |
| E202000 | Phobia unspecified                                           |
| E202100 | Agoraphobia with panic attacks                               |
| E202200 | Agoraphobia without mention of panic attacks                 |
| E202300 | Social phobia fear of eating in public                       |
| E202400 | Social phobia fear of public speaking                        |
| E202500 | Social phobia fear of public washing                         |
| E202600 | Acrophobia                                                   |
| E202700 | Animal phobia                                                |
| E202800 | Claustrophobia                                               |
| E202900 | Fear of crowds                                               |
| E202B00 | Cancer phobia                                                |
| E202C00 | Dental phobia                                                |
| E202E00 | Fear of pregnancy                                            |
| E202z00 | Phobic disorder NOS                                          |
| E20y.00 | Other neurotic disorders                                     |
| E20y200 | Other occupational neurosis                                  |
| E20y300 | Psychasthenic neurosis                                       |
| E20yz00 | Other neurotic disorder NOS                                  |
| E20z.00 | Neurotic disorder NOS                                        |
| E28..00 | Acute reaction to stress                                     |
| E280.00 | Acute panic state due to acute stress reaction               |
| E281.00 | Acute fugue state due to acute stress reaction               |
| E282.00 | Acute stupor state due to acute stress reaction              |
| E283.00 | Other acute stress reactions                                 |
| E283100 | Acute posttrauma stress state                                |
| E283z00 | Other acute stress reaction NOS                              |
| E284.00 | Stress reaction causing mixed disturbance of emotion/conduct |
| E28z.00 | Acute stress reaction NOS                                    |

|         |                                                       |
|---------|-------------------------------------------------------|
| E28z.12 | Flying phobia                                         |
| Eu22y11 | [X]Delusional dysmorphophobia                         |
| Eu4..00 | [X]Neurotic stress - related and somoform disorders   |
| Eu40.00 | [X]Phobic anxiety disorders                           |
| Eu40000 | [X]Agoraphobia                                        |
| Eu40011 | [X]Agoraphobia without history of panic disorder      |
| Eu40012 | [X]Panic disorder with agoraphobia                    |
| Eu40100 | [X]Social phobias                                     |
| Eu40111 | [X]Anthropophobia                                     |
| Eu40112 | [X]Social neurosis                                    |
| Eu40200 | [X]Specific (isolated) phobias                        |
| Eu40211 | [X]Acrophobia                                         |
| Eu40212 | [X]Animal phobias                                     |
| Eu40213 | [X]Claustrophobia                                     |
| Eu40214 | [X]Simple phobia                                      |
| Eu40300 | [X]Needle phobia                                      |
| Eu40y00 | [X]Other phobic anxiety disorders                     |
| Eu40z00 | [X]Phobic anxiety disorder unspecified                |
| Eu40z11 | [X]Phobia NOS                                         |
| Eu40z12 | [X]Phobic state NOS                                   |
| Eu41.00 | [X]Other anxiety disorders                            |
| Eu41000 | [X]Panic disorder [episodic paroxysmal anxiety]       |
| Eu41100 | [X]Generalized anxiety disorder                       |
| Eu41111 | [X]Anxiety neurosis                                   |
| Eu41112 | [X]Anxiety reaction                                   |
| Eu41113 | [X]Anxiety state                                      |
| Eu41300 | [X]Other mixed anxiety disorders                      |
| Eu41y00 | [X]Other specified anxiety disorders                  |
| Eu41y11 | [X]Anxiety hysteria                                   |
| Eu41z00 | [X]Anxiety disorder unspecified                       |
| Eu41z11 | [X]Anxiety NOS                                        |
| Eu42.11 | [X]Anankastic neurosis                                |
| Eu42.12 | [X]Obsessive-compulsive neurosis                      |
| Eu43.00 | [X]Reaction to severe stress and adjustment disorders |
| Eu43000 | [X]Acute stress reaction                              |
| Eu43012 | [X]Acute reaction to stress                           |
| Eu43y00 | [X]Other reactions to severe stress                   |
| Eu43z00 | [X]Reaction to severe stress unspecified              |
| Eu45212 | [X]Dysmorphophobia nondelusional                      |
| Eu45215 | [X]Nosophobia                                         |
| Eu51511 | [X]Dream anxiety disorder                             |
| Z481.00 | Phobia counselling                                    |

|         |                                            |
|---------|--------------------------------------------|
| Z4L1.00 | Anxiety counselling                        |
| Z522400 | Desensitisation - phobia                   |
| Z522600 | Flooding - obsessional compulsive disorder |
| Z522700 | Flooding - agoraphobia                     |

**Depression**

| <b>Read Code</b> | <b>Description</b>                                           |
|------------------|--------------------------------------------------------------|
| E112.00          | Single major depressive episode                              |
| E112.11          | Agitated depression                                          |
| E112.12          | Endogenous depression first episode                          |
| E112.13          | Endogenous depression first episode                          |
| E112.14          | Endogenous depression                                        |
| E112000          | Single major depressive episode unspecified                  |
| E112100          | Single major depressive episode mild                         |
| E112200          | Single major depressive episode moderate                     |
| E112300          | Single major depressive episode severe without psychosis     |
| E112400          | Single major depressive episode severe with psychosis        |
| E112500          | Single major depressive episode partial or unspec remission  |
| E112600          | Single major depressive episode in full remission            |
| E112z00          | Single major depressive episode NOS                          |
| E113.00          | Recurrent major depressive episode                           |
| E113.11          | Endogenous depression - recurrent                            |
| E113000          | Recurrent major depressive episodes unspecified              |
| E113100          | Recurrent major depressive episodes mild                     |
| E113200          | Recurrent major depressive episodes moderate                 |
| E113300          | Recurrent major depressive episodes severe no psychosis      |
| E113400          | Recurrent major depressive episodes with psychosis           |
| E113500          | Recurrent major depressive episodes partial/unspec remission |
| E113600          | Recurrent major depressive episodes in full remission        |
| E113700          | Recurrent depression                                         |
| E113z00          | Recurrent major depressive episode NOS                       |
| E118.00          | Seasonal affective disorder                                  |
| E11y200          | Atypical depressive disorder                                 |
| E11z200          | Masked depression                                            |
| E130.00          | Reactive depressive psychosis                                |



|         |                                                              |
|---------|--------------------------------------------------------------|
| E135.00 | Agitated depression                                          |
| E291.00 | Prolonged depressive reaction                                |
| E2B..00 | Depressive disorder NEC                                      |
| E2B1.00 | Chronic depression                                           |
| Eu32.00 | [X]Depressive episode                                        |
| Eu32.11 | [X]Single episode of depressive reaction                     |
| Eu32.12 | [X]Single episode of psychogenic depression                  |
| Eu32.13 | [X]Single episode of reactive depression                     |
| Eu32000 | [X]Mild depressive episode                                   |
| Eu32100 | [X]Moderate depressive episode                               |
| Eu32200 | [X]Severe depressive episode without psychotic symptoms      |
| Eu32211 | [X]Single episode agitated depressn w/out psychotic symptoms |
| Eu32212 | [X]Single episode major depression w/out psychotic symptoms  |
| Eu32213 | [X]Single episode vital depression w/out psychotic symptoms  |
| Eu32300 | [X]Severe depressive episode with psychotic symptoms         |
| Eu32311 | [X]Single episode of major depression and psychotic symptoms |
| Eu32312 | [X]Single episode of psychogenic depressive psychosis        |
| Eu32313 | [X]Single episode of psychotic depression                    |
| Eu32314 | [X]Single episode of reactive depressive psychosis           |
| Eu32400 | [X]Mild depression                                           |
| Eu32500 | [X]Major depression mild                                     |
| Eu32600 | [X]Major depression moderately severe                        |
| Eu32700 | [X]Major depression severe without psychotic symptoms        |
| Eu32800 | [X]Major depression severe with psychotic symptoms           |
| Eu32y00 | [X]Other depressive episodes                                 |
| Eu32y11 | [X]Atypical depression                                       |
| Eu32y12 | [X]Single episode of masked depression NOS                   |
| Eu32z00 | [X]Depressive episode unspecified                            |
| Eu32z11 | [X]Depression NOS                                            |
| Eu32z12 | [X]Depressive disorder NOS                                   |
| Eu32z13 | [X]Prolonged single episode of reactive depression           |
| Eu32z14 | [X] Reactive depression NOS                                  |
| Eu33.00 | [X]Recurrent depressive disorder                             |

|         |                                                              |
|---------|--------------------------------------------------------------|
| Eu33.11 | [X]Recurrent episodes of depressive reaction                 |
| Eu33.12 | [X]Recurrent episodes of psychogenic depression              |
| Eu33.13 | [X]Recurrent episodes of reactive depression                 |
| Eu33.14 | [X]Seasonal depressive disorder                              |
| Eu33.15 | [X]SAD - Seasonal affective disorder                         |
| Eu33000 | [X]Recurrent depressive disorder current episode mild        |
| Eu33100 | [X]Recurrent depressive disorder current episode moderate    |
| Eu33200 | [X]Recurr depress disorder cur epi severe without psyc sympt |
| Eu33211 | [X]Endogenous depression without psychotic symptoms          |
| Eu33212 | [X]Major depression recurrent without psychotic symptoms     |
| Eu33214 | [X]Vital depression recurrent without psychotic symptoms     |
| Eu33300 | [X]Recurrent depress disorder cur epi severe with psyc symp  |
| Eu33311 | [X]Endogenous depression with psychotic symptoms             |
| Eu33313 | [X]Recurr severe episodes/major depression+psychotic symptom |
| Eu33314 | [X]Recurr severe episodes/psychogenic depressive psychosis   |
| Eu33315 | [X]Recurrent severe episodes of psychotic depression         |
| Eu33316 | [X]Recurrent severe episodes/reactive depressive psychosis   |
| Eu33400 | [X]Recurrent depressive disorder currently in remission      |
| Eu33y00 | [X]Other recurrent depressive disorders                      |
| Eu33z00 | [X]Recurrent depressive disorder unspecified                 |
| Eu33z11 | [X]Monopolar depression NOS                                  |
| Eu34100 | [X]Dysthymia                                                 |

### Eating Disorders

| Read Code | Description                         |
|-----------|-------------------------------------|
| 1467.00   | H/O: anorexia nervosa               |
| 1JZ..00   | Suspected binge eating disorder     |
| 8HTN.00   | Referral to eating disorders clinic |
| 9Nk9.00   | Seen in eating disorder clinic      |

|         |                                                                |
|---------|----------------------------------------------------------------|
| E275200 | Pica                                                           |
| E264200 | Cyclical vomiting - psychogenic                                |
| E271.00 | Anorexia nervosa                                               |
| E275.00 | Other and unspecified non-organic eating disorders             |
| E275000 | Unspecified non-organic eating disorder                        |
| E275100 | Bulimia (non-organic overeating)                               |
| E275111 | Compulsive eating disorder                                     |
| E275400 | Psychogenic vomiting NOS                                       |
| E275y00 | Other specified non-organic eating disorder                    |
| E275z00 | Non-organic eating disorder NOS                                |
| Eu50.00 | [X]Eating disorders                                            |
| Eu50000 | [X]Anorexia nervosa                                            |
| Eu50100 | [X]Atypical anorexia nervosa                                   |
| Eu50200 | [X]Bulimia nervosa                                             |
| Eu50211 | [X]Bulimia NOS                                                 |
| Eu50212 | [X]Hyperorexia nervosa                                         |
| Eu50300 | [X]Atypical bulimia nervosa                                    |
| Eu50400 | [X]Overeating associated with other psychological disturbances |
| Eu50411 | [X]Psychogenic overeating                                      |
| Eu50500 | [X]Vomiting associated with other psychological disturbances   |
| Eu50511 | [X]Psychogenic vomiting                                        |
| Eu50y00 | [X]Other eating disorders                                      |
| Eu50y12 | [X]Psychogenic loss of appetite                                |
| Eu50z00 | [X]Eating disorder                                             |
| Fy05.00 | Nocturnal sleep-related eating disorder                        |
| R036011 | [D]Bulimia NOS                                                 |
| Z4B5.00 | Eating disorder counselling                                    |
| ZC2CD00 | Dietary advice for eating disorder                             |

### Obsessive Compulsive Disorder (OCD)

| Read Code | Description                                            |
|-----------|--------------------------------------------------------|
| E203.00   | Obsessive-compulsive disorders                         |
| E203.11   | Anankastic neurosis                                    |
| E203000   | Compulsive neurosis                                    |
| E203100   | Obsessional neurosis                                   |
| E203z00   | Obsessive-compulsive disorder NOS                      |
| Eu42.00   | [X]Obsessive - compulsive disorder                     |
| Eu42.11   | [X]Anankastic neurosis                                 |
| Eu42.12   | [X]Obsessive-compulsive neurosis                       |
| Eu42000   | [X]Predominantly obsessional thoughts or ruminations   |
| Eu42100   | [X]Predominantly compulsive acts [obsessional rituals] |

|         |                                              |
|---------|----------------------------------------------|
| Eu42200 | [X]Mixed obsessional thoughts and acts       |
| Eu42y00 | [X]Other obsessive-compulsive disorders      |
| Eu42z00 | [X]Obsessive-compulsive disorder unspecified |

**Self-harm**

| Read Code | Description                                                  |
|-----------|--------------------------------------------------------------|
| ZX1H.00   | Self-asphyxiation                                            |
| 146B.00   | H/O: deliberate self harm                                    |
| 146A.00   | H/O: attempted suicide                                       |
| 14K1.00   | Intentional overdose of prescription only medication         |
| 14K0.00   | H/O: repeated overdose                                       |
| 1BD4.00   | Suicide risk                                                 |
| 1BD8.00   | At risk of DSH - deliberate self harm                        |
| 1BDA.00   | Thoughts of deliberate self harm                             |
| 1BD6.00   | Moderate suicide risk                                        |
| 1BDC.00   | Intent of deliberate self harm with detailed plans           |
| 1BDB.00   | Plans for deliberate self harm without intent                |
| 1JP..00   | Suspected drug overdose                                      |
| 8G6..00   | Anti-suicide psychotherapy                                   |
| SL...14   | Overdose of biological substance                             |
| SL90.00   | Antidepressant poisoning                                     |
| SL90z00   | Anti-depressant poisoning NOS                                |
| TK...17   | Para-suicide                                                 |
| TK01011   | Suicide and self inflicted injury by amobarbital             |
| TK01200   | Suicide and self inflicted injury by Butabarbital            |
| TK01411   | Suicide and self inflicted injury by phenobarbital           |
| TK01500   | Suicide and self inflicted injury by Quinalbarbital          |
| TK01511   | Suicide and self inflicted injury by secobarbital            |
| TK55.00   | Suicide and selfinflicted injury by explosives               |
| TK...13   | Poisoning - self-inflicted                                   |
| TK60100   | Self inflicted lacerations to wrist                          |
| TK00.00   | Suicide + selfinflicted poisoning by analgesic/antipyretic   |
| TK...12   | Injury - self-inflicted                                      |
| TK0..00   | Suicide + selfinflicted poisoning by solid/liquid substances |
| TK04.00   | Suicide + selfinflicted poisoning by other                   |

|         |                                                                 |
|---------|-----------------------------------------------------------------|
|         | drugs/medicines                                                 |
| TK60111 | Slashed wrists self inflicted                                   |
| TK30.00 | Suicide and selfinflicted injury by hanging                     |
| TK...14 | Suicide and self harm                                           |
| TK60.00 | Suicide and selfinflicted injury by cutting                     |
| TK03.00 | Suicide + selfinflicted poisoning<br>tranquilliser/psychotropic |
| TK02.00 | Suicide + selfinflicted poisoning by oth<br>sedatives/hypnotics |
| TK3..00 | Suicide + selfinflicted injury by<br>hang/strangulate/suffocate |
| TK6..00 | Suicide and selfinflicted injury by cutting<br>and stabbing     |
| TK0z.00 | Suicide + selfinflicted poisoning by<br>solid/liquid subst NOS  |
| TK...11 | Cause of overdose - deliberate                                  |
| TK01.00 | Suicide + selfinflicted poisoning by<br>barbiturates            |
| TK61.00 | Suicide and selfinflicted injury by stabbing                    |
| TK7..00 | Suicide and selfinflicted injury by jumping<br>from high place  |
| TK4..00 | Suicide and selfinflicted injury by drowning                    |
| TK...15 | Attempted suicide                                               |
| TK3y.00 | Suicide + selfinflicted inj oth mean<br>hang/strangle/suffocate |
| TK6z.00 | Suicide and selfinflicted injury by cutting<br>and stabbing NOS |
| TKx..00 | Suicide and selfinflicted injury by other<br>means              |
| TK1..00 | Suicide + selfinflicted poisoning by gases in<br>domestic use   |
| TK07.00 | Suicide + selfinflicted poisoning by<br>corrosive/caustic subst |
| TK51.00 | Suicide and selfinflicted injury by shotgun                     |
| TK7z.00 | Suicide+selfinflicted injury-jump from high<br>place NOS        |
| TK2..00 | Suicide + selfinflicted poisoning by other<br>gases and vapours |
| TK21.00 | Suicide and selfinflicted poisoning by other<br>carbon monoxide |
| TK70.00 | Suicide+selfinflicted injury-jump from<br>residential premises  |
| TK3z.00 | Suicide + selfinflicted inj by<br>hang/strangle/suffocate NOS   |
| TK01400 | Suicide and self inflicted injury by<br>Phenobarbitone          |

|         |                                                              |
|---------|--------------------------------------------------------------|
| TK71.00 | Suicide+selfinflicted injury-jump from oth manmade structure |
| TK1z.00 | Suicide + selfinflicted poisoning by domestic gases NOS      |
| TK31.00 | Suicide + selfinflicted injury by suffocation by plastic bag |
| TK5..00 | Suicide and selfinflicted injury by firearms and explosives  |
| TKx0.00 | Suicide + selfinflicted injury-jump/lie before moving object |
| TK06.00 | Suicide + selfinflicted poisoning by agricultural chemical   |
| TK01z00 | Suicide and self inflicted injury by barbiturates            |
| TK10.00 | Suicide + selfinflicted poisoning by gas via pipeline        |
| TK72.00 | Suicide+selfinflicted injury-jump from natural sites         |
| TK11.00 | Suicide + selfinflicted poisoning by liquified petrol gas    |
| TK2z.00 | Suicide + selfinflicted poisoning by gases and vapours NOS   |
| TK01000 | Suicide and self inflicted injury by Amylobarbitone          |
| TK2y.00 | Suicide + selfinflicted poisoning by other gases and vapours |
| TK52.00 | Suicide and selfinflicted injury by hunting rifle            |
| TK53.00 | Suicide and selfinflicted injury by military firearms        |
| TK5z.00 | Suicide and selfinflicted injury by firearms/explosives NOS  |
| TK01100 | Suicide and self inflicted injury by Barbitone               |
| TK01300 | Suicide and self inflicted injury by Pentabarbitone          |
| TK08.00 | Suicide + selfinflicted poisoning by arsenic + its compounds |
| TK1y.00 | Suicide and selfinflicted poisoning by other utility gas     |
| TK50.00 | Suicide and selfinflicted injury by handgun                  |
| TK...00 | Suicide and selfinflicted injury                             |
| TKx0z00 | Suicide + selfinflicted inj-jump/lie before moving obj NOS   |
| TKz..00 | Suicide and selfinflicted injury NOS                         |
| TKx1.00 | Suicide and selfinflicted injury by burns or fire            |

|         |                                                             |
|---------|-------------------------------------------------------------|
| TKx2.00 | Suicide and selfinflicted injury by scald                   |
| TKy..00 | Late effects of selfinflicted injury                        |
| TKxz.00 | Suicide and selfinflicted injury by other means NOS         |
| TKxy.00 | Suicide and selfinflicted injury by other specified means   |
| TKx0000 | Suicide + selfinflicted injury-jumping before moving object |
| TKx4.00 | Suicide and selfinflicted injury by electrocution           |
| TKx5.00 | Suicide and selfinflicted injury by crashing motor vehicle  |
| TKx6.00 | Suicide and selfinflicted injury by crashing of aircraft    |
| TKx3.00 | Suicide and selfinflicted injury by extremes of cold        |
| U200100 | [X]Intent self poison nonopioid analgesic at res institut   |
| U200300 | [X]Int self poison nonopioid analges in sport/athletic area |
| U200400 | [X]Intent self pois nonopioid analgesic in street/highway   |
| U200700 | [X]Int self poison/exposure to nonopioid analgesic on farm  |
| U201100 | [X]Intent self poison antiepileptic at res institut         |
| U201200 | [X]Intent self pois nonopioid analges school/pub admin area |
| U201300 | [X]Int self poison antiepileptic in sport/athletic area     |
| U201400 | [X]Intent self pois antiepileptic in street/highway         |
| U201500 | [X]Intent self pois antiepileptic trade/service area        |
| U201600 | [X]Int self poison antiepileptic indust/construct area      |
| U201700 | [X]Int self poison/exposure to antiepileptic on farm        |
| U201y00 | [X]Intent self poison antiepileptic other spec place        |
| U202100 | [X]Intent self poison sedative hypnotic at res institut     |
| U202200 | [X]Int self poison sedative hypnotic school/pub admin area  |
| U202300 | [X]Int self poison sedative hypnotic in sport/athletic area |

|         |                                                              |
|---------|--------------------------------------------------------------|
| U2...11 | [X]Self inflicted injury                                     |
| U2...14 | [X]Attempted suicide                                         |
| U2...15 | [X]Para-suicide                                              |
| U2...13 | [X]Suicide                                                   |
| U200.00 | [X]Intent self poison/exposure to nonopioid analgesic        |
| U2...12 | [X]Injury - self-inflicted                                   |
| U200.13 | [X]Overdose - aspirin                                        |
| U202.12 | [X]Overdose - diazepam                                       |
| U202.00 | [X]Intent self poison/exposure to sedative hypnotic          |
| U2...00 | [X]Intentional self-harm                                     |
| U202.16 | [X]Overdose - benzodiazepine                                 |
| U200.12 | [X]Overdose - ibuprofen                                      |
| U202.11 | [X]Overdose - sleeping tabs                                  |
| U202.13 | [X]Overdose - temazepam                                      |
| U20..00 | [X]Intentional self poisoning/exposure to noxious substances |
| U200000 | [X]Int self poison/exposure to nonopioid analgesic at home   |
| U202.17 | [X]Overdose - barbiturate                                    |
| U200z00 | [X]Intent self poison nonopioid analgesic unspecif place     |
| U201.00 | [X]Intent self poison/exposure to antiepileptic              |
| U202.15 | [X]Overdose - nitrazepam                                     |
| U202000 | [X]Int self poison/exposure to sedative hypnotic at home     |
| U201z00 | [X]Intent self poison antiepileptic unspecif place           |
| U201000 | [X]Int self poison/exposure to antiepileptic at home         |
| U200600 | [X]Int self pois nonopioid analgesic indust/construct area   |
| U200y00 | [X]Int self poison nonopioid analgesic other spec place      |
| U202.18 | [X]Overdose - amobarbital                                    |
| U200200 | [X]Int self poison nonopioid analges school/pub admin area   |
| U202.14 | [X]Overdose - flurazepam                                     |
| U200.11 | [X]Overdose - paracetamol                                    |
| U200500 | [X]Intent self pois nonopioid analgesic trade/service area   |
| U202400 | [X]Intent self pois sedative hypnotic in street/highway      |
| U202500 | [X]Intent self pois sedative hypnotic                        |



|         |                                                                |
|---------|----------------------------------------------------------------|
|         | trade/service area                                             |
| U202600 | [X]Int self pois sedative hypnotic<br>indust/construct area    |
| U202700 | [X]Int self poison/exposure to sedative<br>hypnotic on farm    |
| U203000 | [X]Int self poison/exposure to antiparkinson<br>drug at home   |
| U203100 | [X]Intent self poison antiparkinson drug at<br>res institut    |
| U203200 | [X]Int self poison antparkinson drug<br>school/pub admin area  |
| U203300 | [X]Int self poison antparkinson drug in<br>sport/athletic area |
| U203400 | [X]Intent self pois antiparkinson drug in<br>street/highway    |
| U203500 | [X]Intent self pois antiparkinson drug<br>trade/service area   |
| U203600 | [X]Int self pois antiparkinson drug<br>indust/construct area   |
| U203700 | [X]Int self poison/exposure to antiparkinson<br>drug on farm   |
| U203y00 | [X]Int self poison antiparkinson drug other<br>spec place      |
| U203z00 | [X]Intent self poison antiparkinson drug<br>unspecif place     |
| U204100 | [X]Intent self poison psychotropic drug at<br>res institut     |
| U204200 | [X]Int self poison psychotropic drug<br>school/pub admin area  |
| U204300 | [X]Int self poison psychotropic drug in<br>sport/athletic area |
| U204400 | [X]Intent self pois psychotropic drug in<br>street/highway     |
| U204500 | [X]Intent self pois psychotropic drug<br>trade/service area    |
| U204600 | [X]Int self pois psychotropic drug<br>indust/construct area    |
| U204700 | [X]Int self poison/exposure to psychotropic<br>drug on farm    |
| U205100 | [X]Intent self poison narcotic drug at res<br>institut         |
| U205200 | [X]Int self poison narcotic drug school/pub<br>admin area      |
| U205300 | [X]Int self poison narcotic drug in<br>sport/athletic area     |
| U205400 | [X]Intent self pois narcotic drug in                           |

|         |                                                            |
|---------|------------------------------------------------------------|
|         | street/highway                                             |
| U205500 | [X]Intent self pois narcotic drug trade/service area       |
| U205600 | [X]Int self pois narcotic drug indust/construct area       |
| U205700 | [X]Int self poison/exposure to narcotic drug on farm       |
| U206100 | [X]Intent self poison hallucinogen at res institut         |
| U206200 | [X]Int self poison hallucinogenschool/pub admin area       |
| U206300 | [X]Int self poison hallucinogenin sport/athletic area      |
| U206400 | [X]Intent self pois hallucinogen in street/highway         |
| U206500 | [X]Intent self pois hallucinogen trade/service area        |
| U206600 | [X]Int self pois hallucinogen indust/construct area        |
| U206700 | [X]Int self poison/exposure to hallucinogen on farm        |
| U206y00 | [X]Int self poison hallucinogen other spec place           |
| U207100 | [X]Intent self poison oth autonomic drug at res institut   |
| U207200 | [X]Int self poison oth autonom drug school/pub admin area  |
| U207300 | [X]Int self poison oth autonom drug in sport/athletic area |
| U207400 | [X]Intent self pois oth autonomic drug in street/highway   |
| U207500 | [X]Intent self pois oth autonomic drug trade/service area  |
| U207600 | [X]Int self pois oth autonomic drug indust/construct area  |
| U207700 | [X]Int self poison/exposure to oth autonomic drug on farm  |
| U207y00 | [X]Int self poison oth autonomic drug other spec place     |
| U205.00 | [X]Intent self poison/exposure to narcotic drug            |
| U204.11 | [X]Overdose - antidepressant                               |
| U204.12 | [X]Overdose - amitriptyline                                |
| U204.13 | [X]Overdose - SSRI                                         |
| U208000 | [X]Int self poison/exposure to oth/unsp drug/medicam home  |

|         |                                                             |
|---------|-------------------------------------------------------------|
| U204000 | [X]Int self poison/exposure to psychotropic drug at home    |
| U206.00 | [X]Intent self poison/exposure to hallucinogen              |
| U205000 | [X]Int self poison/exposure to narcotic drug at home        |
| U202z00 | [X]Intent self poison sedative hypnotic unspecif place      |
| U204z00 | [X]Intent self poison psychotropic drug unspecif place      |
| U205z00 | [X]Intent self poison narcotic drug unspecif place          |
| U207.00 | [X]Intent self poison/exposure to oth autonomic drug        |
| U207000 | [X]Int self poison/exposure to oth autonomic drug at home   |
| U207z00 | [X]Intent self poison oth autonomic drug unspecif place     |
| U202y00 | [X]Int self poison sedative hypnotic other spec place       |
| U204y00 | [X]Int self poison psychotropic drug other spec place       |
| U205y00 | [X]Int self poison narcotic drug other spec place           |
| U206000 | [X]Int self poison/exposure to hallucinogen at home         |
| U206z00 | [X]Intent self poison hallucinogen unspecif place           |
| U208.00 | [X]Int self poison/exposure to other/unspec drug/medicament |
| U208100 | [X]Intent self poison oth/unsp drug/medicam res institut    |
| U208200 | [X]Int self poison oth/uns drug/med school/pub admin area   |
| U208300 | [X]Int self poison oth/uns drug/med in sport/athletic area  |
| U208400 | [X]Intent self pois oth/unsp drug/medic in street/highway   |
| U208500 | [X]Intent self pois oth/unsp drug/medic trade/service area  |
| U208700 | [X]Int self poison/exposure to oth/unsp drug/medic on farm  |
| U209100 | [X]Intent self poison alcohol at res institut               |
| U209200 | [X]Int self poison alcohol school/pub admin area            |
| U209300 | [X]Int self poison alcohol in sport/athletic                |

|         |                                                             |
|---------|-------------------------------------------------------------|
|         | area                                                        |
| U209400 | [X]Intent self pois alcohol in street/highway               |
| U209500 | [X]Intent self pois alcohol trade/service area              |
| U209600 | [X]Int self pois alcohol indust/construct area              |
| U209700 | [X]Int self poison/exposure to alcohol on farm              |
| U20A100 | [X]Int self poison org solvent halogen hydrocarb res instit |
| U20A200 | [X]Int self poison org solvent halogen hydrocarb school     |
| U20A300 | [X]Int self poison org solvent halogen hydrocarb sport area |
| U20A500 | [X]Int self poison org solvent halogen hydrocarb trade area |
| U20A600 | [X]Int self pois org solvent halogen hydrocarb indust area  |
| U20A700 | [X]Int self poison org solvent halogen hydrocarb on farm    |
| U20Ay00 | [X]Int self pois org solv halogen hydrocarb oth spec place  |
| U20B100 | [X]Intent self poison other gas/vapour at res institut      |
| U20B300 | [X]Int self poison other gas/vapour in sport/athletic area  |
| U20B400 | [X]Intent self pois other gas/vapour in street/highway      |
| U20B500 | [X]Intent self pois other gas/vapour trade/service area     |
| U20B600 | [X]Int self pois other gas/vapour indust/construct area     |
| U20B700 | [X]Int self poison/exposure to other gas/vapour on farm     |
| U20C000 | [X]Int self poison/exposure to pesticide at home            |
| U20C100 | [X]Intent self poison pesticide at res institut             |
| U20C200 | [X]Int self poison pesticide school/pub admin area          |
| U20C300 | [X]Int self poison pesticide in sport/athletic area         |
| U20C400 | [X]Intent self pois pesticide in street/highway             |
| U20C500 | [X]Intent self pois pesticide trade/service area            |
| U20C600 | [X]Int self pois pesticide indust/construct                 |

|         |                                                             |
|---------|-------------------------------------------------------------|
|         | area                                                        |
| U20Cz00 | [X]Intent self poison pesticide unspecif place              |
| U20y100 | [X]Intent self poison unspecif chemical at res institut     |
| U20y300 | [X]Int self poison unspecif chemical in sport/athletic area |
| U20y400 | [X]Intent self pois unspecif chemical in street/highway     |
| U20y500 | [X]Intent self pois unspecif chemical trade/service area    |
| U20y600 | [X]Int self pois unspecif chemical indust/construct area    |
| U20y700 | [X]Int self poison/exposure to unspecif chemical on farm    |
| U20yy00 | [X]Int self poison unspecif chemical other spec place       |
| U20B.00 | [X]Intent self poison/exposure to other gas/vapour          |
| U20B.11 | [X]Self carbon monoxide poisoning                           |
| U20y.00 | [X]Intent self poison/exposure to unspecif chemical         |
| U20y000 | [X]Int self poison/exposure to unspecif chemical at home    |
| U20A.00 | [X]Intentional self poison organ solvent halogen hydrocarb  |
| U209z00 | [X]Intent self poison alcohol unspecif place                |
| U209000 | [X]Int self poison/exposure to alcohol at home              |
| U20C.11 | [X]Self poisoning with weedkiller                           |
| U20B000 | [X]Int self poison/exposure to other gas/vapour at home     |
| U20C.12 | [X]Self poisoning with paraquat                             |
| U20yz00 | [X]Intent self poison unspecif chemical unspecif place      |
| U20C.00 | [X]Intent self poison/exposure to pesticide                 |
| U20Az00 | [X]Int self pois org solv halogen hydrocarb unspec place    |
| U20Bz00 | [X]Intent self poison other gas/vapour unspecif place       |
| U208y00 | [X]Int self poison oth/unsp drug/medic other spec place     |
| U20A000 | [X]Intent self pois organ solvent halogen hydrocarb home    |
| U209y00 | [X]Int self poison alcohol other spec place                 |
| U20B200 | [X]Int self poison other gas/vapour                         |

|         |                                                              |
|---------|--------------------------------------------------------------|
|         | school/pub admin area                                        |
| U20Cy00 | [X]Int self poison pesticide other spec place                |
| U20A400 | [X]Int self poison org solvent halogen hydrocarb in highway  |
| U20By00 | [X]Int self poison other gas/vapour other spec place         |
| U20C700 | [X]Int self poison/exposure to pesticide on farm             |
| U20y200 | [X]Int self poison unspecif chemical school/pub admin area   |
| U208600 | [X]Int self pois oth/unsp drug/medic indust/construct area   |
| U20A.11 | [X]Self poisoning from glue solvent                          |
| U214.00 | [X]Intent self harm by hangng strangult/suffoct street/h'way |
| U223.00 | [X]Intent self harm by drown/submersn occ sport/athlet area  |
| U224.00 | [X]Intent self harm by drowning/submersn occ street/highway  |
| U225.00 | [X]Intent self harm by drown/submersn occ trade/service area |
| U226.00 | [X]Intent self harm by drown/submersn occ indust/constr area |
| U227.00 | [X]Intent self harm by drowning/submersion occurrn on farm   |
| U230.00 | [X]Intention self harm by handgun discharge occurrn at home  |
| U231.00 | [X]Intent self harm by handgun disch occ in resid instit'n   |
| U232.00 | [X]Intent self harm h'gun disch occ sch oth ins/pub adm area |
| U233.00 | [X]Intent self harm by handgun disch occ sport/athlet area   |
| U234.00 | [X]Intent self harm by handgun disch occ on street/highway   |
| U235.00 | [X]Intent self harm by handgun disch occ trade/service area  |
| U236.00 | [X]Intent self harm by handgun disch occ indust/constr area  |
| U237.00 | [X]Intention self harm by handgun discharge occurrn on farm  |
| U23y.00 | [X]Intent self harm by handgun disch occ at oth specif plce  |
| U23z.00 | [X]Intent self harm by handgun disch occ at unspecif place   |
| U241.00 | [X]Int self harm rifl s'gun/lrg frarm disch occ              |

|         |                                                               |
|---------|---------------------------------------------------------------|
|         | resid instit                                                  |
| U242.00 | [X]Int slf hrm rifl s'gun/lrg frarm disch/ins/pub adm area    |
| U243.00 | [X]Int self harm rifl s'gun/lrg frarm disch sprt/athlet area  |
| U244.00 | [X]Int self harm rifl s'gun/lrg frarm disch occ street/h'way  |
| U245.00 | [X]Int self harm rifl s'gun/lrg frarm disch trad/service area |
| U246.00 | [X]Int slf hrm rifl s'gun/lrg frarm disch indust/constr area  |
| U247.00 | [X]Intent self harm rifle sh'gun/largr firarm disch occ farm  |
| U24y.00 | [X]Int self harm rifl s'gun/lrg frarm disch oth specif place  |
| U24z.00 | [X]Int self harm rifl s'gun/lrg frarm disch occ unspec place  |
| U250.00 | [X]Intent self harm oth/unspecif firearm disch occ at home    |
| U251.00 | [X]Intent self harm oth/unsp firearm disch occ resid instit   |
| U252.00 | [X]Inten self harm oth/uns firarm disch sch/ins/pub adm area  |
| U253.00 | [X]Inten self harm oth/uns firearm disch occ sprt/athl area   |
| U254.00 | [X]Intent self harm oth/unsp firearm disch occ street/h'way   |
| U255.00 | [X]Intent self harm oth/uns firearm disch trade/service area  |
| U256.00 | [X]Inten self harm oth/uns firearm disch indust/constr area   |
| U257.00 | [X]Intent self harm oth/unspecif firearm disch occ on farm    |
| U25y.00 | [X]Intent self harm oth/unsp firearm disch oth specif place   |
| U25z.00 | [X]Intent self harm oth/unsp firearm disch occ unspecif plce  |
| U260.00 | [X]Intention self harm by explosive material occurrn home     |
| U261.00 | [X]Intention self harm by explosiv materl occ resid instit    |
| U262.00 | [X]Intent self harm by explosiv materl sch/ins/pub adm area   |
| U263.00 | [X]Intent self harm by explosv materl occ sport/athlet area   |
| U264.00 | [X]Intention self harm by explosiv materl                     |

|         |                                                              |
|---------|--------------------------------------------------------------|
|         | occ street/highway                                           |
| U265.00 | [X]Intent self harm by explosv materl occ trade/service area |
| U266.00 | [X]Intent self harm by explosv materl occ indust/constr area |
| U267.00 | [X]Intention self harm by explosive material occurrn farm    |
| U22..00 | [X]Intentional self harm by drowning and submersion          |
| U21z.00 | [X]Intent self harm by hangng strangul/suffoct unspecif plce |
| U24..00 | [X]Intent self harm by rifle shotgun/larger firearm disch    |
| U211.00 | [X]Intent self harm by hangng strangult/suffoct resid instit |
| U212.00 | [X]Inten slf harm hang strang/suffc sch oth ins/pub adm area |
| U21y.00 | [X]Intent self harm by hangng strangul/suffoct oth spec plce |
| U22y.00 | [X]Intent self harm by drown/submersn occ oth specif place   |
| U22z.00 | [X]Intent self harm by drown/submersn occ unspecified place  |
| U220.00 | [X]Intent self harm by drowning/submersion occurrn at home   |
| U213.00 | [X]Intent self harm by hang strangl/suffc sport/athlet area  |
| U215.00 | [X]Intent self harm by hang strangl/suffc trade/service area |
| U216.00 | [X]Intent self harm by hang strangl/suffc indust/constr area |
| U217.00 | [X]Intent self harm by hanging strangulat/suffocat occ farm  |
| U221.00 | [X]Intent self harm by drowning/submersn occ resid instit'n  |
| U25..00 | [X]Intent self harm by other/unspecified firearm discharge   |
| U222.00 | [X]Intent self harm drown/submers occ sch/ins/pub adm area   |
| U23..00 | [X]Intentional self harm by handgun discharge                |
| U240.00 | [X]Intent self harm rifle sh'gun/largr firarm disch occ home |
| U26..00 | [X]Intentional self harm by explosive material               |
| U210.00 | [X]Intent self harm by hanging                               |



|         |                                                              |
|---------|--------------------------------------------------------------|
|         | strangulat/suffocat occ home                                 |
| U26y.00 | [X]Intent self harm by explosiv materl occ oth specif place  |
| U26z.00 | [X]Intent self harm by explosiv materl occ unspecif place    |
| U271.00 | [X]Intent self harm by smoke fire/flame occ resid instit'n   |
| U272.00 | [X]Intent self harm by smoke fire/flame sch/ins/pub adm area |
| U273.00 | [X]Intent self harm by smok fire/flam occ sport/athlet area  |
| U275.00 | [X]Intent self harm by smok fire/flam occ trade/service area |
| U276.00 | [X]Intent self harm by smok fire/flam occ indust/constr area |
| U277.00 | [X]Intention self harm by smoke fire/flames occurrn on farm  |
| U281.00 | [X]Intent self harm by steam hot vapour/obj occ resid instit |
| U283.00 | [X]Int self harm by steam hot vapour/obj occ sport/athl area |
| U284.00 | [X]Intent self harm by steam hot vapour/obj occ street/h'way |
| U285.00 | [X]Int self harm by steam hot vapour/obj trade/service area  |
| U286.00 | [X]Int self harm by steam hot vapour/obj indust/constr area  |
| U287.00 | [X]Intent self harm by steam hot vapour/hot obj occ on farm  |
| U28y.00 | [X]Intent self harm by steam hot vapour/obj oth specif place |
| U293.00 | [X]Intent self harm by sharp object occ sports/athlet area   |
| U2A4.00 | [X]Intention self harm by blunt object occ street/highway    |
| U2A5.00 | [X]Intent self harm by blunt object occ trade/service area   |
| U2A6.00 | [X]Intent self harm by blunt object occ indust/constr area   |
| U2A7.00 | [X]Intentional self harm by blunt object occurrence on farm  |
| U2Ay.00 | [X]Intention self harm by blunt object occ oth specif place  |
| U2B2.00 | [X]Int self harm jump fr high place sch oth ins/pub adm area |
| U2B3.00 | [X]Intent self harm by jump from high place                  |

|         |                                                               |
|---------|---------------------------------------------------------------|
|         | sport/athl area                                               |
| U2B5.00 | [X]Intent self harm by jump from high place trad/service area |
| U2B7.00 | [X]Intent self harm by jumping from high place occ on farm    |
| U2C0.00 | [X]Intent self harm by jump/lying befor moving obj occ home   |
| U2C1.00 | [X]Int self harm jump/lying befr mov obje occ resid instit'n  |
| U2C2.00 | [X]Int self harm jump/lying bef mov obj sch/ins/pub adm area  |
| U2C3.00 | [X]Int self harm jump/lying bef mov obj occ sprt/athlet area  |
| U2C5.00 | [X]Int self harm jump/lying bef mov obj occ trad/service area |
| U2C6.00 | [X]Int self harm jump/lying befr mov obj indust/constr area   |
| U290.00 | [X]Intentional self harm by sharp object occurrence at home   |
| U29z.00 | [X]Intentional self harm by sharp object occ unspecif place   |
| U27..00 | [X]Intentional self harm by smoke fire and flames             |
| U2A..00 | [X]Intentional self harm by blunt object                      |
| U2C..00 | [X]Intent self harm by jumping / lying before moving object   |
| U28..00 | [X]Intentional self harm by steam hot vapours / hot objects   |
| U29y.00 | [X]Intention self harm by sharp object occ oth specif place   |
| U291.00 | [X]Intent self harm by sharp object occ resident instit'n     |
| U2B0.00 | [X]Intent self harm by jumping from high place occ at home    |
| U270.00 | [X]Intention self harm by smoke fire/flames occurrn at home   |
| U2Bz.00 | [X]Int self harm by jump from high place occ unspecif place   |
| U280.00 | [X]Intent self harm by steam hot vapour/hot obj occ at home   |
| U27z.00 | [X]Intent self harm by smoke fire/flames occ unspecif place   |
| U2A3.00 | [X]Intent self harm by blunt object occ sports/athlet area    |
| U2B4.00 | [X]Intent self harm by jump from high place occ street/h'way  |

|         |                                                              |
|---------|--------------------------------------------------------------|
| U2A2.00 | [X]Intent self harm blunt obj occ sch oth ins/pub adm area   |
| U296.00 | [X]Intent self harm by sharp object occ indust/constr area   |
| U2A1.00 | [X]Intent self harm by blunt object occ resident instit'n    |
| U27y.00 | [X]Intent self harm by smoke fire/flame occ oth specif plce  |
| U2B1.00 | [X]Intent self harm by jump from high place occ resid instit |
| U2By.00 | [X]Int self harm by jump from high place occ oth specif plce |
| U2C4.00 | [X]Int self harm jump/lying befr mov obje occ street/highway |
| U274.00 | [X]Intent self harm by smoke fire/flame occ street/highway   |
| U282.00 | [X]Int self harm by steam hot vapor/obj sch/ins/pub adm area |
| U28z.00 | [X]Intent self harm by steam hot vapour/obj occ unspec place |
| U294.00 | [X]Intention self harm by sharp object occ street/highway    |
| U295.00 | [X]Intent self harm by sharp object occ trade/service area   |
| U297.00 | [X]Intentional self harm by sharp object occurrence on farm  |
| U2A0.00 | [X]Intentional self harm by blunt object occurrence at home  |
| U2B6.00 | [X]Int self harm by jump from high place indust/constr area  |
| U2Az.00 | [X]Intentional self harm by blunt object occ unspecif place  |
| U2B..00 | [X]Intentional self harm by jumping from a high place        |
| U292.00 | [X]Intent self harm sharp obj occ sch oth ins/pub adm area   |
| U2C7.00 | [X]Intent self harm by jump/lying befor moving obj occ farm  |
| U2Cz.00 | [X]Int self harm jump/lying bef mov obje occ unspecif place  |
| U2D1.00 | [X]Intent self harm by crash motor vehicl occ resid instit'n |
| U2D2.00 | [X]Int self harm crash motor vehicl occ sch/ins/pub adm area |
| U2D3.00 | [X]Intent self harm by crash motor vehicl occ sprt/athl area |

|         |                                                               |
|---------|---------------------------------------------------------------|
| U2D5.00 | [X]Intent self harm crash motor vehicl occ trade/service area |
| U2D7.00 | [X]Intent self harm by crash of motor vehicl occurrn on farm  |
| U2y2.00 | [X]Intent self harm oth specif mean occ sch/ins/pub adm area  |
| U2y3.00 | [X]Intent self harm by oth specif means occ sport/athl area   |
| U2y4.00 | [X]Intent self harm by oth specif means occ street/highway    |
| U2y5.00 | [X]Intent self harm by oth specif means occ trad/service area |
| U2y7.00 | [X]Intentionl self harm by oth specif means occurrn on farm   |
| U2z3.00 | [X]Intent self harm unspecif means occurrn sport/athlet area  |
| U2z4.00 | [X]Intent self harm by unspecif means occurrn street/highway  |
| U2z5.00 | [X]Intent self harm unspecif means occurrn trade/service area |
| U2z6.00 | [X]Intent self harm unspecif mean occurrn indust/constr area  |
| U2z7.00 | [X]Intentional self harm by unspecif means occurrn on farm    |
| U30..11 | [X]Deliberate drug poisoning                                  |
| U2y0.00 | [X]Intentionl self harm by oth specif means occurrn at home   |
| U2zz.00 | [X]Intent self harm by unspecif means occ at unspecif place   |
| U2z0.00 | [X]Intentional self harm by unspecif means occurrn at home    |
| U2D..00 | [X]Intentional self harm by crashing of motor vehicle         |
| U2yz.00 | [X]Intent self harm by oth specif means occ unspecif place    |
| U2y1.00 | [X]Intent self harm by oth specif means occ resid instit'n    |
| U2yy.00 | [X]Intent self harm oth specif means occ oth specif place     |
| U2z2.00 | [X]Intent self harm by unspec mean occ sch/ins/pub adm area   |
| U2zy.00 | [X]Intent self harm by unspecif means occ oth specif place    |
| U2Dz.00 | [X]Intent self harm by crash motor vehic occ unspecif place   |
| U2z1.00 | [X]Intent self harm by unspecif means                         |

|         |                                                                 |
|---------|-----------------------------------------------------------------|
|         | occurrn resid instit'n                                          |
| U2Cy.00 | [X]Int self harm jump/lying bef mov obje<br>occ oth specif plce |
| U2D0.00 | [X]Intent self harm by crash of motor vehicl<br>occurrn at home |
| U2D4.00 | [X]Intent self harm by crash motor vehicl<br>occ street/highway |
| U2D6.00 | [X]Intent self harm crash motor vehic occ<br>indust/constr area |
| U2Dy.00 | [X]Intent self harm by crash motor vehic<br>occ oth specif plce |
| U2y6.00 | [X]Intent self harm oth specif means occ<br>indust/constr area  |
| U2y..00 | [X]Intentional self harm by other specified<br>means            |
| U44..00 | [X]Rifle shotgun+larger firearm discharge<br>undetermin intent  |
| U45..00 | [X]Other+unspecified firearm discharge<br>undetermined intent   |
| U4B..00 | [X]Falling jumping/pushed from high place<br>undeterm intent    |
| U4Bz.00 | [X]Fall jump/push frm high plce undt intnt<br>occ unspecif plce |
| U613200 | [X]Overdose of radiation given during<br>therapy                |
| U72..00 | [X]Sequel intentn self-harm assault+event<br>of undeterm intent |
| U720.00 | [X]Sequelae of intentional self-harm                            |
| Z9K3100 | Removing objects that could be used for<br>suicide attempt      |
| ZV1B200 | [V]Personal history of self-harm                                |
| ZX15.00 | Drowning self                                                   |
| ZX11500 | Biting own tongue                                               |
| ZX11600 | Biting sides of own cheeks                                      |
| ZX12.00 | Burning self                                                    |
| ZX...00 | Self-harm                                                       |
| ZX13.11 | Cuts self                                                       |
| ZX1..00 | Self-injurious behaviour                                        |
| ZX11200 | Biting own fingers                                              |
| ZX11.11 | Bites self                                                      |
| ZX13.00 | Cutting self                                                    |
| ZX11.00 | Biting self                                                     |
| ZX1..14 | Self-abusive behaviour                                          |
| ZX11100 | Biting own hand                                                 |
| ZX13200 | Cutting own throat                                              |
| ZX1..12 | SIB - Self-injurious behaviour                                  |

|         |                                                            |
|---------|------------------------------------------------------------|
| ZX11300 | Biting own toes                                            |
| ZX11400 | Biting own arm                                             |
| ZX...11 | Self-damage                                                |
| ZX1L400 | Self-mutilation of eyes                                    |
| ZX1LD00 | [X]Self mutilation                                         |
| ZX1N.00 | Stabbing self                                              |
| ZX1LA00 | Removing own nails                                         |
| ZX1L500 | Enucleation of own eyes                                    |
| ZX14.00 | Damaging own wounds                                        |
| ZX1M.00 | Shooting self                                              |
| ZX1L200 | Self-mutilation of genitalia                               |
| ZX14300 | Poking fingers into wound                                  |
| ZX1L300 | Self-mutilation of penis                                   |
| ZX1Q.00 | Throwing self in front of train                            |
| ZX1S.00 | Throwing self onto floor                                   |
| ZX1L600 | Self-mutilation of ears                                    |
| ZX1L811 | Snapping own bones                                         |
| ZX1L800 | Breaking own bones                                         |
| ZX1R.11 | Jumping in front of vehicle                                |
| ZX1R.00 | Throwing self in front of vehicle                          |
| SL...15 | Overdose of drug                                           |
| U20..11 | [X]Deliberate drug overdose / other poisoning              |
| ZX1..13 | Deliberate self-harm                                       |
| U29..00 | [X]Intentional self harm by sharp object                   |
| SLHz.00 | Drug and medicament poisoning NOS                          |
| ZX13100 | Cutting own wrists                                         |
| U21..00 | [X]Intent self harm by hanging strangulation / suffocation |
| U2z..00 | [X]Intentional self harm by unspecified means              |
| 1BD5.00 | High suicide risk                                          |
| ZX1G.00 | Scratches self                                             |
| U209.00 | [X]Intent self poison/exposure to alcohol                  |
| ZX1I.00 | Self-scalding                                              |
| U208z00 | [X]Intent self poison oth/unsp drug/medic unspecif place   |
| TK20.00 | Suicide + selfinflicted poisoning by motor veh exhaust gas |
| U204.00 | [X]Intent self poison/exposure to psychotropic drug        |
| ZX1L.00 | Self-mutilation                                            |
| U41..00 | [X]Hanging strangulation + suffocation undetermined intent |
| ZX1H100 | Self-strangulation                                         |
| ZX1L100 | Self-mutilation of hands                                   |

|         |                                                               |
|---------|---------------------------------------------------------------|
| ZX1K.11 | Setting fire to self                                          |
| TKx7.00 | Suicide and selfinflicted injury caustic subst<br>excl poison |
| ZX1J.00 | Self-electrocution                                            |
| ZX1E.00 | Pinching self                                                 |
| 8G6Z.00 | Anti-suicide psychotherapy NOS                                |
| TK54.00 | Suicide and selfinflicted injury by other<br>firearm          |
| ZX1K.00 | Self-incineration                                             |
| ZX1H200 | Self-suffocation                                              |
| TKx0100 | Suicide + selfinflicted injury-lying before<br>moving object  |
| U203.00 | [X]Intent self poison/exposure to<br>antiparkinson drug       |
| ZX1Q.11 | Jumping under train                                           |
| ZX1K.12 | Setting self alight                                           |
| TK05.00 | Suicide + selfinflicted poisoning by drug or<br>medicine NOS  |
| ZX16.00 | Gouging own body parts                                        |
| U2E..00 | [X]Self mutilation                                            |
| ZX18.00 | Hanging self                                                  |
| ZX1B200 | Jumping from bridge                                           |
| ZX1B.00 | Jumping from height                                           |
| ZX1B100 | Jumping from building                                         |
| ZX1B300 | Jumping from cliff                                            |
| ZX16100 | Gouging own flesh                                             |
| ZX16200 | Gouging own eyes                                              |

Table S1: Baseline Characteristics

|                                              | Exposed            | Unexposed          |
|----------------------------------------------|--------------------|--------------------|
| Number of patients (n)                       | 2,491,086          | 3,120,795          |
| Number of patients with asthma diagnosis (n) | 472,984            | 289,733            |
| Number of patients with eczema diagnosis (n) | 455,348            | 368,631            |
| Median (IQR) follow-up period (person years) | 5.10 (2.02 – 9.68) | 4.10 (1.59 – 8.34) |
| Mean (SD) age at cohort entry (years)        | 39.42 (23.65)      | 35.82 (22.18)      |
| Sex (n)                                      |                    |                    |
| Male                                         | 1,129,954          | 1,561,600          |
| Female                                       | 1,361,132          | 1,559,195          |
| Body mass index, n (%)                       |                    |                    |
| Underweight (<18.5 kg/m <sup>2</sup> )       | 40,490 (1.63)      | 52,183 (1.67)      |
| Normal (18.5-24.9 kg/m <sup>2</sup> )        | 687,723 (27.61)    | 823,813 (26.37)    |
| Overweight (25.0-29.9 kg/m <sup>2</sup> )    | 541,784 (21.75)    | 559,747 (17.94)    |
| Obese (>30.0 kg/m <sup>2</sup> )             | 348,395 (13.99)    | 309,638 (9.92)     |
| Not available                                | 872,694 (35.03)    | 1,376,414 (44.10)  |
| Smoking status, n (%)                        |                    |                    |
| Current smoker                               | 348,532 (13.99)    | 474,997 (15.22)    |
| Non-current smoker                           | 1,574,697 (63.21)  | 1,681,427 (53.88)  |
| Not available                                | 567,857 (22.80)    | 964,371 (30.90)    |
| Drinking status, n (%)                       |                    |                    |
| Current Drinker                              | 1,266,898 (50.86)  | 1,394,009 (44.67)  |
| Non-current drinker                          | 370,169 (14.86)    | 383,121 (12.28)    |
| Not available                                | 854,019 (34.28)    | 1,343,665 (43.06)  |
| Townsend index, n (%)                        |                    |                    |
| (Least deprived) 1                           | 535,228 (21.49)    | 657,876 (21.08)    |
| 2                                            | 464,489 (18.65)    | 552,836 (17.71)    |
| 3                                            | 453,156 (18.19)    | 559,287 (17.92)    |
| 4                                            | 388,862 (15.61)    | 487,405 (15.62)    |
| 5                                            | 262,946 (10.56)    | 327,192(10.48)     |
| Not available                                | 386,405 (15.51)    | 536,199 (17.18)    |
| Ethnicity, n (%)                             |                    |                    |
| White                                        | 1,050,939 (42.19)  | 1,102,464 (35.33)  |
| Black                                        | 45,742 (1.84)      | 51,693 (1.66)      |
| South Asian                                  | 66,060 (2.65)      | 74,762 (2.40)      |
| Mixed                                        | 16,818 (0.68)      | 19,759 (0.63)      |
| Other                                        | 37,641 (1.51)      | 54,566 (1.75)      |
| Missing                                      | 1,273,886 (51.14)  | 1,817,551 (58.24)  |



Table S2: Hazard ratios with 95% confidence intervals (CI) for mental ill health among patients with any atopic or allergic disorder compared to matched unexposed individuals

|                     |           | Number of<br>outcomes | Person Years | Incidence Rate<br>(per 10,000<br>person years) | Unadjusted<br>Hazard Ratio           | Adjusted Hazard<br>Ratio             |
|---------------------|-----------|-----------------------|--------------|------------------------------------------------|--------------------------------------|--------------------------------------|
| Composite           | Exposed   | 229,124               | 15,900,000   | 144.13                                         | 1.23 (95% CI 1.22-<br>1.24, p<0.001) | 1.16 (95% CI 1.15-<br>1.16, p<0.001) |
|                     | Unexposed | 203,514               | 17,200,000   | 118.20                                         |                                      |                                      |
|                     |           |                       |              |                                                |                                      |                                      |
| SMI                 | Exposed   | 5,581                 | 17,200,000   | 32.46                                          | 1.00 (95% CI 0.97-<br>1.04, p 0.834) | 0.99 (95% CI 0.96-<br>1.03, p 0.994) |
|                     | Unexposed | 5,954                 | 18,300,000   | 32.46                                          |                                      |                                      |
|                     |           |                       |              |                                                |                                      |                                      |
| Anxiety             | Exposed   | 93,848                | 16,700,000   | 56.21                                          | 1.30 (95% CI 1.29-<br>1.31, p<0.001) | 1.21 (95% CI 1.20-<br>1.23, p<0.001) |
|                     | Unexposed | 77,388                | 18,000,000   | 43.11                                          |                                      |                                      |
|                     |           |                       |              |                                                |                                      |                                      |
| Depression          | Exposed   | 138,658               | 16,400,000   | 84.59                                          | 1.24 (95% CI 1.23-<br>1.26, p<0.001) | 1.15 (95% CI 1.14-<br>1.16, p<0.001) |
|                     | Unexposed | 121,378               | 17,700,000   | 68.75                                          |                                      |                                      |
|                     |           |                       |              |                                                |                                      |                                      |
| Eating<br>disorders | Exposed   | 4,188                 | 17,200,000   | 2.44                                           | 1.06 (95% CI 1.01-<br>1.10, p 0.011) | 1.06 (95% CI 1.01-<br>1.10, p 0.013) |
|                     | Unexposed | 4,295                 | 18,300,000   | 2.34                                           |                                      |                                      |
|                     |           |                       |              |                                                |                                      |                                      |
| OCD                 | Exposed   | 3,565                 | 17,200,000   | 2.07                                           | 1.19 (95% CI 1.13-<br>1.25, p<0.001) | 1.18 (95% CI 1.13-<br>1.24, p<0.001) |
|                     | Unexposed | 3,191                 | 18,400,000   | 1.74                                           |                                      |                                      |
|                     |           |                       |              |                                                |                                      |                                      |
| Self harm           | Exposed   | 21,959                | 17,100,000   | 12.83                                          | 1.00 (95% CI 0.98-<br>1.02, p 0.945) | 1.03 (95% CI 1.01-<br>1.05, p 0.006) |
|                     | Unexposed | 23,426                | 18,300,000   | 12.83                                          |                                      |                                      |

\*Adjusted hazard ratio: adjusted for age, sex, alcohol use, smoking status, body mass index (BMI), Townsend deprivation quintile score, asthma, and eczema at baseline

Table S3: Hazard ratios with 95% confidence intervals (CI) for mental ill health among patients with food allergy only compared to matched unexposed individuals

|                  |           | Number of<br>outcomes | Person Years | Incidence Rate<br>(per 10,000<br>person years) | Unadjusted<br>Hazard Ratio           | Adjusted Hazard<br>Ratio             |
|------------------|-----------|-----------------------|--------------|------------------------------------------------|--------------------------------------|--------------------------------------|
| Composite        | Exposed   | 6,955                 | 583, 190     | 119.26                                         | 1.20 (95% CI 1.16-<br>1.24, p<0.001) | 1.07 (95% CI 1.03-<br>1.11, p<0.001) |
|                  | Unexposed | 6,409                 | 651,196      | 98.42                                          |                                      |                                      |
|                  |           |                       |              |                                                |                                      |                                      |
| SMI              | Exposed   | 180                   | 617,205      | 29.16                                          | 1.27 (95% CI 1.03-<br>1.58, p 0.029) | 1.26 (95% CI 1.00-<br>1.59, p 0.046) |
|                  | Unexposed | 154                   | 681,363      | 22.60                                          |                                      |                                      |
|                  |           |                       |              |                                                |                                      |                                      |
| Anxiety          | Exposed   | 2,908                 | 604,387      | 48.12                                          | 1.32 (95% CI 1.25-<br>1.39, p<0.001) | 1.14 (95% CI 1.08-<br>1.21, p<0.001) |
|                  | Unexposed | 2,390                 | 671,622      | 35.59                                          |                                      |                                      |
|                  |           |                       |              |                                                |                                      |                                      |
| Depression       | Exposed   | 3,692                 | 597,935      | 61.75                                          | 1.16 (95% CI 1.11-<br>1.22, p<0.001) | 1.02 (95% CI 0.97-<br>1.07, p 0.378) |
|                  | Unexposed | 3,509                 | 663,826      | 52.86                                          |                                      |                                      |
|                  |           |                       |              |                                                |                                      |                                      |
| Eating disorders | Exposed   | 263                   | 616,739      | 4.26                                           | 1.17 (95% CI 0.98-<br>1.39, p 0.082) | 1.10 (95% CI 0.91-<br>1.33, p 0.315) |
|                  | Unexposed | 250                   | 680,942      | 3.67                                           |                                      |                                      |
|                  |           |                       |              |                                                |                                      |                                      |
| OCD              | Exposed   | 188                   | 617,035      | 3.05                                           | 1.47 (95% CI 1.18-<br>1.83, p 0.001) | 1.28 (95% CI 1.01-<br>1.63, p 0.042) |
|                  | Unexposed | 138                   | 681,327      | 2.03                                           |                                      |                                      |
|                  |           |                       |              |                                                |                                      |                                      |
| Self harm        | Exposed   | 917                   | 614,055      | 14.93                                          | 1.03 (95% CI 0.94-<br>1.13, p 0.505) | 0.98 (95% CI 0.89-<br>1.08, p 0.651) |
|                  | Unexposed | 954                   | 677,879      | 14.07                                          |                                      |                                      |

\*Adjusted hazard ratio: adjusted for age, sex, alcohol use, smoking status, body mass index (BMI), Townsend deprivation quintile score, asthma, and eczema at baseline

Table S4: Hazard ratios with 95% confidence intervals (CI) for mental ill health among patients with drug allergy only compared to matched unexposed individuals

|                     |           | Number of<br>outcomes | Person Years | Incidence Rate<br>(per 10,000<br>person years) | Unadjusted<br>Hazard Ratio           | Adjusted Hazard<br>Ratio             |
|---------------------|-----------|-----------------------|--------------|------------------------------------------------|--------------------------------------|--------------------------------------|
| Composite           | Exposed   | 136,246               | 8,629,804    | 157.88                                         | 1.34 (95% CI 1.33-<br>1.35, p<0.001) | 1.27 (95% CI 1.26-<br>1.28, p<0.001) |
|                     | Unexposed | 104,769               | 8,747,397    | 119.77                                         |                                      |                                      |
|                     |           |                       |              |                                                |                                      |                                      |
| SMI                 | Exposed   | 3,467                 | 9,429,027    | 36.77                                          | 1.07 (95% CI 1.02-<br>1.12, p 0.007) | 1.07 (95% CI 1.02-<br>1.12, p 0.01)  |
|                     | Unexposed | 3,256                 | 9,340,622    | 34.86                                          |                                      |                                      |
|                     |           |                       |              |                                                |                                      |                                      |
| Anxiety             | Exposed   | 55,508                | 9,120,391    | 60.86                                          | 1.43 (95% CI 1.41-<br>1.45, p<0.001) | 1.36 (95% CI 1.34-<br>1.37, p<0.001) |
|                     | Unexposed | 39,018                | 9,136,285    | 42.71                                          |                                      |                                      |
|                     |           |                       |              |                                                |                                      |                                      |
| Depression          | Exposed   | 85,637                | 8,920,011    | 96.01                                          | 1.34 (95% CI 1.33-<br>1.36, p<0.001) | 1.26 (95% CI 1.24-<br>1.27, p<0.001) |
|                     | Unexposed | 65,211                | 8,964,301    | 72.75                                          |                                      |                                      |
|                     |           |                       |              |                                                |                                      |                                      |
| Eating<br>disorders | Exposed   | 1,834                 | 9,434,611    | 1.94                                           | 1.13 (95% CI 1.06-<br>1.21, p<0.001) | 1.16 (95% CI 1.09-<br>1.24, p<0.001) |
|                     | Unexposed | 1,648                 | 9,347,463    | 1.76                                           |                                      |                                      |
|                     |           |                       |              |                                                |                                      |                                      |
| OCD                 | Exposed   | 1,663                 | 9,434,811    | 1.76                                           | 1.30 (95% CI 1.21-<br>1.40, p<0.001) | 1.34 (95% CI 1.25-<br>1.45, p<0.001) |
|                     | Unexposed | 1,268                 | 9,348,323    | 1.36                                           |                                      |                                      |
|                     |           |                       |              |                                                |                                      |                                      |
| Self harm           | Exposed   | 10,780                | 9,390,771    | 11.48                                          | 1.13 (95% CI 1.10-<br>1.16, p<0.001) | 1.19 (95% CI 1.15-<br>1.22, p<0.001) |
|                     | Unexposed | 9,515                 | 9,309,052    | 10.22                                          |                                      |                                      |

\*Adjusted hazard ratio: adjusted for age, sex, alcohol use, smoking status, body mass index (BMI), Townsend deprivation quintile score, asthma, and eczema at baseline

Table S5: Hazard ratios with 95% confidence intervals (CI) for mental ill health among patients with anaphylaxis only compared to matched unexposed individuals

|                     |           | Number of<br>outcomes | Person Years | Incidence Rate<br>(per 10,000<br>person years) | Unadjusted<br>Hazard Ratio           | Adjusted Hazard<br>Ratio             |
|---------------------|-----------|-----------------------|--------------|------------------------------------------------|--------------------------------------|--------------------------------------|
| Composite           | Exposed   | 1,773                 | 100,899      | 175.72                                         | 1.54 (95% CI 1.43-<br>1.65, p<0.001) | 1.42 (95% CI 1.31-<br>1.53, p<0.001) |
|                     | Unexposed | 1,260                 | 108,843      | 115.76                                         |                                      |                                      |
|                     |           |                       |              |                                                |                                      |                                      |
| SMI                 | Exposed   | 33                    | 111,340      | 2.96                                           | 0.90 (95% CI 0.57-<br>1.44, p 0.675) | 0.89 (95% CI 0.54-<br>1.46, p 0.635) |
|                     | Unexposed | 38                    | 115,815      | 3.28                                           |                                      |                                      |
|                     |           |                       |              |                                                |                                      |                                      |
| Anxiety             | Exposed   | 769                   | 107,135      | 71.78                                          | 1.76 (95% CI 1.56-<br>1.97, p<0.001) | 1.61 (95% CI 1.43-<br>1.82, p<0.001) |
|                     | Unexposed | 462                   | 113,477      | 40.71                                          |                                      |                                      |
|                     |           |                       |              |                                                |                                      |                                      |
| Depression          | Exposed   | 1,050                 | 104,749      | 100.24                                         | 1.52 (95% CI 1.39-<br>1.67, p<0.001) | 1.40 (95% CI 1.27-<br>1.55, p<0.001) |
|                     | Unexposed | 747                   | 111,561      | 66.96                                          |                                      |                                      |
|                     |           |                       |              |                                                |                                      |                                      |
| Eating<br>disorders | Exposed   | 31                    | 111,337      | 2.78                                           | 1.12 (95% CI 0.67-<br>1.86, p 0.664) | 0.93 (95% CI 0.54-<br>1.63, p 0.813) |
|                     | Unexposed | 29                    | 115,840      | 2.50                                           |                                      |                                      |
|                     |           |                       |              |                                                |                                      |                                      |
| OCD                 | Exposed   | 32                    | 111,288      | 2.87                                           | 2.18 (95% CI 1.19-<br>3.97, p 0.011) | 2.59 (95% CI 1.38-<br>4.86, p 0.003) |
|                     | Unexposed | 16                    | 115,901      | 1.38                                           |                                      |                                      |
|                     |           |                       |              |                                                |                                      |                                      |
| Self harm           | Exposed   | 196                   | 110,613      | 17.72                                          | 1.46 (95% CI 1.18-<br>1.82, p 0.001) | 1.43 (95% CI 1.13-<br>1.80, p 0.003) |
|                     | Unexposed | 139                   | 115,346      | 12.05                                          |                                      |                                      |

\*Adjusted hazard ratio: adjusted for age, sex, alcohol use, smoking status, body mass index (BMI), Townsend deprivation quintile score, asthma, and eczema at baseline

Table S6: Hazard ratios with 95% confidence intervals (CI) for mental ill health among patients with urticaria only compared to matched unexposed individuals

|                     |           | Number of<br>outcomes | Person Years | Incidence Rate<br>(per 10,000<br>person years) | Unadjusted<br>Hazard Ratio           | Adjusted Hazard<br>Ratio             |
|---------------------|-----------|-----------------------|--------------|------------------------------------------------|--------------------------------------|--------------------------------------|
| Composite           | Exposed   | 43,001                | 2,966,951    | 175.72                                         | 1.25 (95% CI 1.24-<br>1.27, p<0.001) | 1.16 (95% CI 1.14-<br>1.18, p<0.001) |
|                     | Unexposed | 35,369                | 3,050,446    | 115.76                                         |                                      |                                      |
|                     |           |                       |              |                                                |                                      |                                      |
| SMI                 | Exposed   | 863                   | 3,231,215    | 2.67                                           | 0.88 (95% CI 0.80-<br>0.97, p 0.007) | 0.85 (95% CI 0.77-<br>0.93, p 0.001) |
|                     | Unexposed | 974                   | 3,249,189    | 3.00                                           |                                      |                                      |
|                     |           |                       |              |                                                |                                      |                                      |
| Anxiety             | Exposed   | 18,675                | 3,123,901    | 59.78                                          | 1.33 (95% CI 1.30-<br>1.36, p<0.001) | 1.22 (95% CI 1.20-<br>1.25, p<0.001) |
|                     | Unexposed | 14,051                | 3,176,950    | 44.23                                          |                                      |                                      |
|                     |           |                       |              |                                                |                                      |                                      |
| Depression          | Exposed   | 24,988                | 3,072,521    | 81.33                                          | 1.28 (95% CI 1.25-<br>1.30, p<0.001) | 1.16 (95% CI 1.14-<br>1.18, p<0.001) |
|                     | Unexposed | 20,079                | 3,132,763    | 64.09                                          |                                      |                                      |
|                     |           |                       |              |                                                |                                      |                                      |
| Eating<br>disorders | Exposed   | 1,090                 | 3,229,622    | 3.38                                           | 1.14 (95% CI 1.05-<br>1.24, p 0.003) | 1.14 (95% CI 1.04-<br>1.24, p 0.004) |
|                     | Unexposed | 972                   | 3,249,245    | 2.99                                           |                                      |                                      |
|                     |           |                       |              |                                                |                                      |                                      |
| OCD                 | Exposed   | 786                   | 3,230,785    | 2.43                                           | 1.21 (95% CI 1.09-<br>1.35, p<0.001) | 1.18 (95% CI 1.06-<br>1.31, p 0.002) |
|                     | Unexposed | 645                   | 3,250,544    | 1.98                                           |                                      |                                      |
|                     |           |                       |              |                                                |                                      |                                      |
| Self harm           | Exposed   | 5,105                 | 3,209,184    | 15.91                                          | 1.05 (95% CI 1.01-<br>1.09, p 0.021) | 1.05 (95% CI 1.01-<br>1.09, p 0.021) |
|                     | Unexposed | 4,838                 | 3,230,221    | 14.98                                          |                                      |                                      |

\*Adjusted hazard ratio: adjusted for age, sex, alcohol use, smoking status, body mass index (BMI), Townsend deprivation quintile score, asthma, and eczema at baseline

Table S7: Hazard ratios with 95% confidence intervals (CI) for mental ill health among patients with allergic rhinitis only compared to matched unexposed individuals

|                     |           | Number of<br>outcomes | Person Years | Incidence Rate<br>(per 10,000<br>person years) | Unadjusted<br>Hazard Ratio           | Adjusted Hazard<br>Ratio             |
|---------------------|-----------|-----------------------|--------------|------------------------------------------------|--------------------------------------|--------------------------------------|
| Composite           | Exposed   | 104,297               | 7,075,459    | 147.41                                         | 1.21 (95% CI 1.20-<br>1.22, p<0.001) | 1.12 (95% CI 1.11-<br>1.13, p<0.001) |
|                     | Unexposed | 95,412                | 7,744,558    | 123.20                                         |                                      |                                      |
|                     |           |                       |              |                                                |                                      |                                      |
| SMI                 | Exposed   | 2,354                 | 7,695,113    | 3.06                                           | 0.96 (95% CI 0.91-<br>1.02, p 0.169) | 0.96 (95% CI 0.91-<br>1.02, p 0.217) |
|                     | Unexposed | 2,622                 | 8,282,321    | 3.17                                           |                                      |                                      |
|                     |           |                       |              |                                                |                                      |                                      |
| Anxiety             | Exposed   | 44,525                | 7,448,442    | 59.78                                          | 1.30 (95% CI 1.27-<br>1.31, p<0.001) | 1.19 (95% CI 1.18-<br>1.21, p<0.001) |
|                     | Unexposed | 37,075                | 8,091,138    | 45.82                                          |                                      |                                      |
|                     |           |                       |              |                                                |                                      |                                      |
| Depression          | Exposed   | 61,919                | 7,318,942    | 84.60                                          | 1.22 (95% CI 1.20-<br>1.23, p<0.001) | 1.12 (95% CI 1.11-<br>1.13, p<0.001) |
|                     | Unexposed | 55,821                | 7,960,109    | 70.13                                          |                                      |                                      |
|                     |           |                       |              |                                                |                                      |                                      |
| Eating<br>disorders | Exposed   | 2,200                 | 7,694,901    | 2.86                                           | 1.06 (95% CI 1.00-<br>1.12, p 0.065) | 1.02 (95% CI 0.96-<br>1.09, p 0.506) |
|                     | Unexposed | 2,284                 | 8,284,274    | 2.76                                           |                                      |                                      |
|                     |           |                       |              |                                                |                                      |                                      |
| OCD                 | Exposed   | 1,972                 | 7,695,515    | 2.56                                           | 1.23 (95% CI 1.15-<br>1.31, p<0.001) | 1.18 (95% CI 1.10-<br>1.26, p<0.001) |
|                     | Unexposed | 1,726                 | 8,286,295    | 2.08                                           |                                      |                                      |
|                     |           |                       |              |                                                |                                      |                                      |
| Self harm           | Exposed   | 10,787                | 7,652,323    | 14.10                                          | 0.93 (95% CI 0.91-<br>0.95, p<0.001) | 0.93 (95% CI 0.91-<br>0.96, p<0.001) |
|                     | Unexposed | 12,491                | 8,234,424    | 15.17                                          |                                      |                                      |

\*Adjusted hazard ratio: adjusted for age, sex, alcohol use, smoking status, body mass index (BMI), Townsend deprivation quintile score, asthma, and eczema at baseline
